# High-density linkage maps and chromosome level genome assemblies unveil direction and frequency of extensive structural rearrangements in wood white butterflies (*Leptidea* spp.)

Höök, L.<sup>1\*</sup>, Näsvall, K.<sup>1\*</sup>, Vila, R.<sup>2</sup>, Wiklund, C.<sup>3</sup>, and Backström, N.<sup>1</sup>

1. Evolutionary Biology Program, Department of Ecology and Genetics, Uppsala University. Norbyvägen 18D, 752 36 Uppsala, Sweden
2. Butterfly Diversity and Evolution Lab, Institut de Biologia Evolutiva (CSIC-UPF), Barcelona, Spain
3. Department of Zoology: Division of Ecology, Stockholm University, Stockholm, Sweden

\*Correspondence:

Lars Höök: [lars.hook\[at\]ebc.uu.se](mailto:lars.hook@ebc.uu.se)

Karin Näsvall: [karin.nasvall\[at\]ebc.uu.se](mailto:karin.nasvall@ebc.uu.se)

Evolutionary Biology Program, Department of Ecology and Genetics, Uppsala University.  
Norbyvägen 18D, 752 36 Uppsala, Sweden

✂ Equal author contribution

Keywords: Linkage map, Genome rearrangements, Karyotype evolution, Lepidoptera,

Chromosome fissions/fusions

Running title: Chromosome rearrangements in *Leptidea* butterflies

## 2 Abstract

3 Karyotypes are generally conserved between closely related species and large chromosome  
4 rearrangements typically have negative fitness consequences in heterozygotes, potentially  
5 driving speciation. In the order Lepidoptera, most investigated species have the ancestral  
6 karyotype and gene synteny is often conserved across deep divergence, although examples  
7 of extensive genome reshuffling have recently been demonstrated. The genus *Leptidea* has  
8 an unusual level of chromosome variation and rearranged sex chromosomes, but the extent  
9 of restructuring across the rest of the genome is so far unknown. To explore the genomes of  
10 the wood white (*Leptidea*) species complex, we generated eight genome assemblies using a  
11 combination of 10X linked reads and HiC data, and improved them using linkage maps for  
12 two populations of the common wood white (*L. sinapis*) with distinct karyotypes. Synteny  
13 analysis revealed an extensive amount of rearrangements, both compared to the ancestral  
14 karyotype and between the *Leptidea* species, where only one of the three Z chromosomes  
15 was conserved across all comparisons. Most restructuring was explained by fissions and  
16 fusions, while translocations appear relatively rare. We further detected several examples of  
17 segregating rearrangement polymorphisms supporting a highly dynamic genome evolution in  
18 this clade. Fusion breakpoints were enriched for LINES and LTR elements, which suggests  
19 that ectopic recombination might be an important driver in the formation of new  
20 chromosomes. Our results show that chromosome count alone may conceal the extent of  
21 genome restructuring and we propose that the amount of genome evolution in Lepidoptera  
22 might still be underestimated due to lack of taxonomic sampling.

## 23 Introduction

24 The karyomorph is the highest order of organization of the genetic material and  
25 understanding the mechanistic underpinnings and micro- and macro-evolutionary effects of  
26 changes in chromosome numbers are long-standing goals in evolutionary biology (Mayrose

27 & Lysak, 2021). Chromosome rearrangements have for example been suggested to be  
28 important drivers of speciation as a consequence of meiotic segregation problems and  
29 suppressed recombination in chromosomal heterozygotes (Faria & Navarro, 2010;  
30 Rieseberg, 2001). The number and structure of chromosomes are generally conserved  
31 within species and between closely related taxa, while substantial karyotypic changes can  
32 occur over longer evolutionary distances (Román-Palacios et al., 2021; Ruckman et al.,  
33 2020). In contrast, there are some examples of considerable chromosome rearrangement  
34 rate differences between closely related species, but the underlying reasons for why  
35 karyotypic change have occurred comparatively rapidly in some lineages are largely  
36 unexplored (de Vos et al., 2020; Ruckman et al., 2020; Sylvester et al., 2020). Chromosomal  
37 rearrangements, in particular fission and fusion events, are likely often underdominant  
38 and/or deleterious and the probability of their fixation in a population should therefore be  
39 higher in organisms with lower effective population size ( $N_e$ ) (Pennell et al., 2015), or with  
40 strong meiotic drive (Blackmon et al., 2019). Additionally, the consequences of fissions and  
41 fusions seem to depend on the types of chromosomes a species harbor. In species with  
42 holokinetic chromosomes (holocentric), the spindle apparatus can bind to multiple positions  
43 along the chromosomes, while the attachment is restricted to the specific centromere region  
44 in monocentric species (Melters et al., 2012). As a consequence, chromosome fissions and  
45 fusions do not necessarily lead to meiotic segregation problems in holocentric species  
46 (Faulkner, 1972; Lukhtanov et al., 2018). This has been hypothesized to lead to a higher rate  
47 of chromosome number evolution in holocentric compared to monocentric species. However,  
48 the evidence for such a rate difference have been mixed and a recent, large-scale meta-  
49 analyses across insects suggests that chromosome evolution is not significantly faster in  
50 holocentric species (Ruckman et al., 2020), and the explanation for rate differences between  
51 species might rather be lineage specific life-history traits or demographics (Kawakami et al.,  
52 2009; Larson et al., 1984; Petitpierre, 1987).

53

54 The order Lepidoptera, moths and butterflies, constitutes one of the most species rich and  
55 widespread animal groups and has for long been a popular study system in ecology and  
56 evolution, in large part due to the high diversity and the eye-catching colour pattern  
57 variations that have attracted both amateur naturalists and academic scholars for centuries  
58 (Boggs et al., 2003). Lepidoptera also share several key genetic features, like holocentric  
59 chromosomes (Suomalainen, 1953), and female heterogamety and achiasmy (Traut et al.,  
60 2007; Turner & Sheppard, 1975), which present interesting aspects regarding chromosomal  
61 rearrangements and their evolutionary consequences. The karyotype structure has generally  
62 been found to be conserved across lepidopteran genera, with most investigated taxa having  
63 the inferred ancestral haploid chromosome number of  $n = 31$  (de Vos et al., 2020; Robinson,  
64 1971). However, the genera *Agrodiaetus* ( $n = 10 - 134$ , Kandul et al., 2007) and *Godyris* ( $n =$   
65  $13 - 120$ , Brown et al., 2004), for example, have been shown to have an elevated rate of  
66 karyotype evolution compared to other insects (Ruckman et al., 2020). On a more detailed  
67 level, genomic analyses have also unveiled a high level of conserved gene synteny between  
68 divergent lepidopteran lineages (Ahola et al., 2014; Davey et al., 2016; Pringle et al., 2007).  
69 Extensive, genome-wide chromosomal restructuring has so far only been detected in *Pieris*  
70 *napi* / *P. rapae* (Hill et al., 2019). However, since the analyses have been limited to a  
71 comparatively small set of taxonomic lineages where highly contiguous genome assemblies  
72 and / or linkage maps are available, the levels of both karyotype variation and intra-  
73 chromosomal rearrangements in Lepidoptera are likely underestimated (de Vos et al., 2020).

74

75 An attractive model system for studying karyotype evolution is the Eurasian wood white  
76 butterflies in the genus *Leptidea* (family Pieridae). The three species, common wood white  
77 (*Leptidea sinapis*), Réal's wood white (*Leptidea reali*) and the cryptic wood white (*Leptidea*  
78 *juvernica*), form a species complex of morphologically nearly indistinguishable species that  
79 show remarkable inter- and intraspecific variation in chromosome numbers (Dincă et al.,  
80 2011; Lukhtanov et al., 2011). Cytogenetic analyses have shown that *L. reali* has rather few  
81 chromosomes and less intraspecific variation ( $n = 25 - 28$ ), while *L. juvernica* has a

82 considerably more fragmented and variable karyotype ( $n = 38 - 46$ ) (Dincă et al., 2011;  
83 Šíchová et al., 2015). The most striking chromosome number variation has been found in *L.*  
84 *sinapis*, which has one of the most extreme non-polyploid, intraspecific karyotype clines of  
85 all eukaryotes, ranging from  $n \approx 53 - 55$  in southern Europe and gradually decreasing to  $n \approx$   
86  $28 - 29$  in northern Europe and  $n \approx 28 - 31$  in central Asia (Lukhtanov et al., 2011, 2018). In  
87 addition, the common ancestor of the species complex has undergone translocations of  
88 autosomal genes to the sex chromosome(s) and extension of the ancestral Z chromosome  
89 that has resulted in a set of neo sex chromosomes (Šíchová et al., 2015; Yoshido et al.,  
90 2020). *Leptidea* butterflies have also experienced a relatively recent burst of transposable  
91 element activity (Talla et al., 2017), elements that could act as important drivers of  
92 chromosome rearrangements (Belyayev, 2014), but whether this has been important for  
93 karyotype evolution specifically in this genus remains to be explored. Altogether, these  
94 findings motivate detailed characterization of the rate and direction of the chromosome  
95 rearrangements and assessment of potential drivers of the rapid karyotype changes in this  
96 lineage.

97

98 In order to dissect the chromosome structure in detail and quantify rates and directions of  
99 chromosome rearrangements, we sequenced and assembled the genome of a male and  
100 female individual of *L. juvernica*, *L. reali* and the Swedish and Catalan populations of *L.*  
101 *sinapis* using a combination of 10X linked reads and HiC-scaffolding. In addition, we  
102 generated genetic maps for the two *L. sinapis* populations and used the linkage information  
103 to super-scaffold and correct the physical genome assemblies. The assembled  
104 chromosomes were compared between wood white species and with the inferred ancestral  
105 lepidopteran karyotype to characterize rates and patterns of fissions, fusions and intra-  
106 chromosomal rearrangements across the species complex. Furthermore, we quantified  
107 enrichment of different types of genetic elements in fission and fusion breakpoints to assess  
108 if specific genomic features have been associated with chromosome rearrangements.

## 109 Results

110 The genome assemblies had extensive contiguity, high BUSCO scores (Supplementary  
 111 table 1), few gaps and the majority of sequence contained in chromosome-sized scaffolds  
 112 (Table 1, Supplementary figures 1 and 2). The implementation of linkage map information for  
 113 the Swedish and Catalan *L. sinapis* (Figure 1) allowed for correction of these particular  
 114 genome assemblies. Overall, we found a high level of collinearity between physical maps  
 115 and linkage maps, but several large inversions were corrected (Supplementary figure 3). The  
 116 Catalan *L. sinapis* male assembly was also compared to the DToL assembly of a *L. sinapis*  
 117 male from Asturias at the north-western Iberian Peninsula (Lohse et al., 2022). Apart from  
 118 differences which likely represent genuine rearrangements (see ‘Chromosome  
 119 rearrangements’), there was a high level of collinearity between these two assemblies  
 120 (Supplementary figure 4).

Table 1. Estimated summary statistics for the 8 different *Leptidea* genome assemblies.

| Statistic                          | <i>L. juvernica</i><br>female | <i>L. juvernica</i><br>male | <i>L. reali</i><br>female | <i>L. reali</i><br>male | <i>L. sinapis</i><br>Swedish<br>female | <i>L. sinapis</i><br>Swedish<br>male | <i>L. sinapis</i><br>Catalan<br>female | <i>L. sinapis</i><br>Catalan<br>male |
|------------------------------------|-------------------------------|-----------------------------|---------------------------|-------------------------|----------------------------------------|--------------------------------------|----------------------------------------|--------------------------------------|
| Assembly size (Mb)                 | 675                           | 660                         | 670                       | 642                     | 685                                    | 664                                  | 672                                    | 655                                  |
| Sequence N's (%)                   | 3.4%                          | 4.1%                        | 3.7%                      | 2.4%                    | 5.4%                                   | 5.6%                                 | 3.3%                                   | 3.8%                                 |
| GC (%)                             | 35.6%                         | 35.5%                       | 35.4%                     | 35.3%                   | 35.4%                                  | 35.3%                                | 35.4%                                  | 35.4%                                |
| Predicted genes (N)                | -                             | 16 149                      | -                         | 15 689                  | -                                      | 15 915                               | -                                      | 16 478                               |
| BUSCO genes (%)                    | 93.7%                         | 95.0%                       | 93.4%                     | 93.4%                   | 93.9%                                  | 93.8%                                | 94.6%                                  | 94.5%                                |
| Pseudo-chromosomes (N)             | 43                            | 42                          | 26                        | 26                      | 28                                     | 29                                   | 52                                     | 52                                   |
| Sequence in Pseudo-chromosomes (%) | 83.3%                         | 90.7%                       | 88.0%                     | 88.4%                   | 89.2%                                  | 90.2%                                | 89.2%                                  | 90.4%                                |
| Read mapping (%)                   | 98.2%                         | 98.6%                       | 98.3%                     | 98.0%                   | 98.1%                                  | 98.6%                                | 98.2%                                  | 98.2%                                |
| Repeat content (%)                 | 54.6%                         | 52.0%                       | 52.0%                     | 54.1%                   | 52.0%                                  | 51.3%                                | 53.6%                                  | 53.2%                                |
| Scaffolds (N)                      | 20 731                        | 16 073                      | 16 210                    | 15 448                  | 17 536                                 | 16 022                               | 17 757                                 | 16 290                               |
| Scaffold N50 (Mb)                  | 15.087                        | 15.702                      | 22.890                    | 21.966                  | 24.480                                 | 21.838                               | 11.055                                 | 11.044                               |

|                 |        |        |        |        |        |        |        |        |
|-----------------|--------|--------|--------|--------|--------|--------|--------|--------|
| Contigs (N)     | 36 909 | 30 088 | 29 081 | 28 137 | 31 643 | 29 387 | 31 619 | 31 643 |
| Contig N50 (kb) | 65.133 | 79.484 | 81.855 | 82.283 | 72.761 | 73.965 | 78.960 | 79.404 |

a)

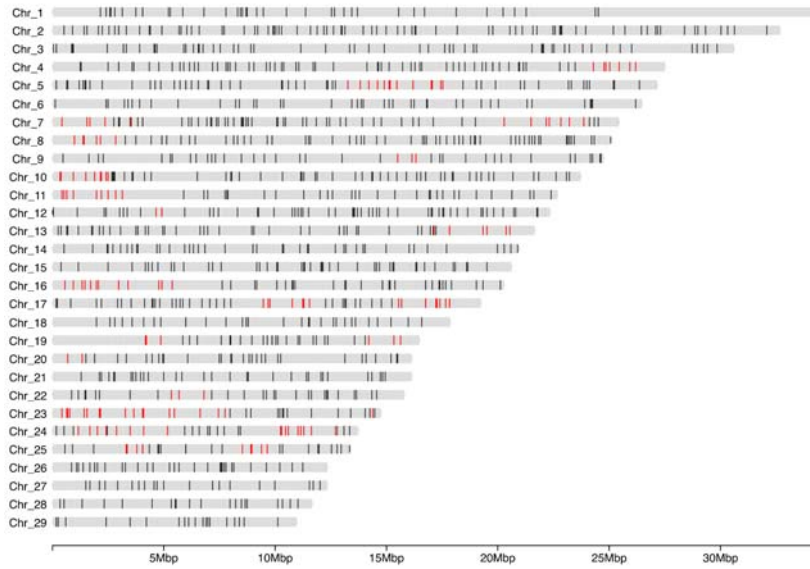

b)

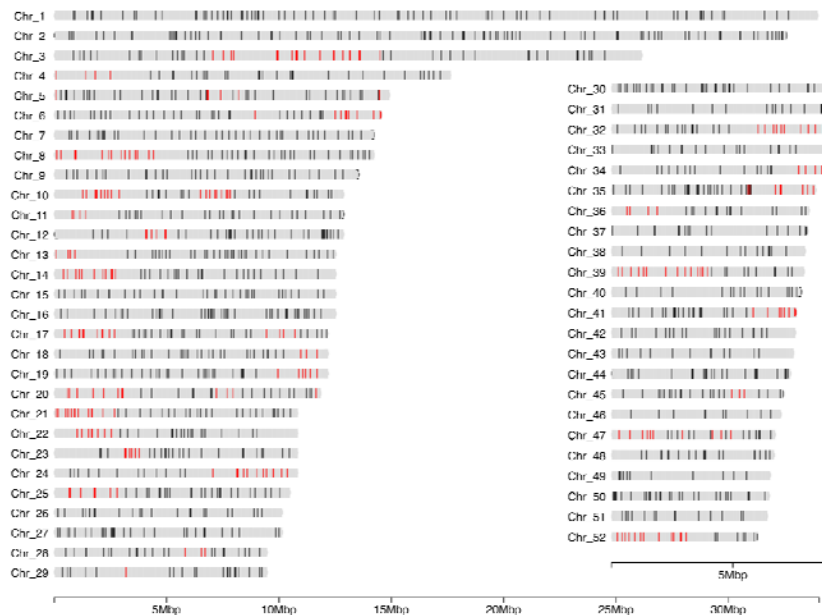

Figure 1. Linkage maps based on pedigrees for a) the Swedish, and b) the Catalan populations of *L. sinapis*. Vertical bars on each chromosome represent the position of linkage informative markers ordered according to the physical map (genome assembly). The x-axis represents the physical

position of each marker in megabases (Mb). Red colour represents markers where the marker order in the linkage map was found to deviate from the order in the preliminary physical assembly.

121

## 122 *Chromosome rearrangements*

123 In order to characterize how chromosomes in the *Leptidea* clade correspond to the  
124 presumably nearly ancestral lepidopteran karyotypes of *B. mori* and *M. cinxia*, gene orders  
125 were compared between the different lineages (Figure 2). The synteny analysis revealed a  
126 considerable amount of large rearrangements where each *Leptidea* chromosome showed  
127 homology to 3 - 5 (median) *B. mori* chromosomes (Figure 2, Supplementary figure 5,  
128 Supplementary table 2). Not only have all chromosomes in *Leptidea* been restructured  
129 compared to the ancestral lepidopteran karyotype, but the frequency of rearrangements  
130 between *Leptidea* species was also high. Only one of the sex chromosomes (Z2) showed  
131 conserved synteny across all *Leptidea* species (Figure 2). When compared to *B. mori*, the  
132 *Leptidea* genomes contained 372 - 410 distinct synteny blocks. The synteny blocks ranged  
133 between 0.94 - 1.00 Mb, corresponding to 12.5 - 14.5 blocks per chromosome, and  
134 contained 24 - 25 genes (medians given; Supplementary table 2).

135



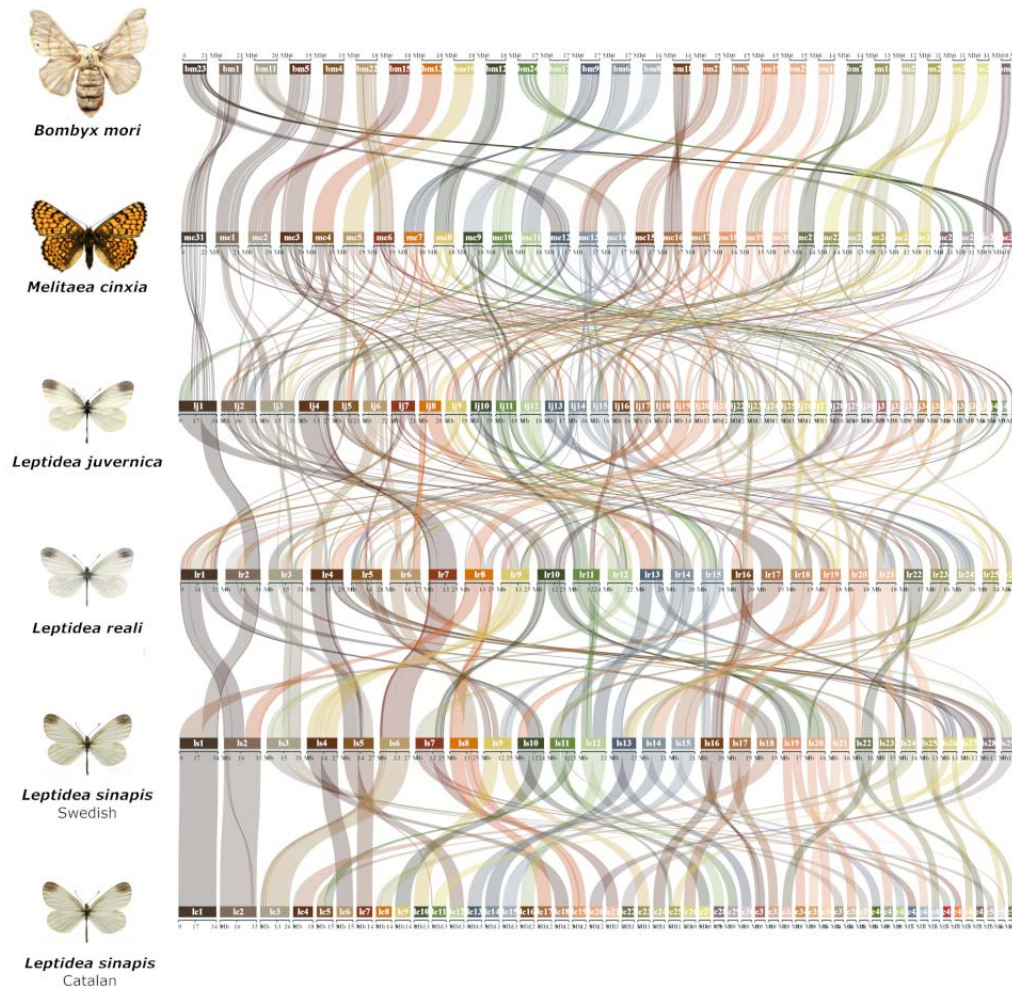

Figure 2. Comparison of synteny between the *Leptidea* species and the two references *B. mori* and *M. cinxia*. The karyotype of the latter species is assumed to represent the ancestral lepidopteran karyotype (Ahola et al., 2014). Chromosomes are ordered by size in each species. Pair-wise comparisons between *B. mori* and each respective *Leptidea* lineage are available in Supplementary Figure 5.

136 Since equivalent large-scale genome restructuring was recently shown in another pierid  
137 butterfly, *P. napi* (Hill et al., 2019), we also compared synteny between *P. napi* and the  
138 different *Leptidea* species. Apart from one syntenic chromosome pair (*P. napi* chromosome  
139 18 and Catalan *L. sinapis* chromosome 31), all chromosome pairs in the comparisons  
140 contained a mix of synteny blocks from at least two different chromosomes, indicating that

141 the absolute majority of rearrangements in *P. napi* and *Leptidea* have occurred  
142 independently in the two different lineages (Supplementary figure 6).

143

144 After discovering the considerable genomic reorganizations in *Leptidea*, we aimed at  
145 characterizing the different rearrangements in more detail. A phylogenetic approach was  
146 implemented to infer the most parsimonious scenario for intra-specific chromosome  
147 rearrangements. In *L. sinapis*, the data indicate that 9 fusions have occurred in the Swedish  
148 population (Supplementary figure 7) and 8 fissions (Supplementary figure 8) and two fusions  
149 (Supplementary figure 7) in the Catalan population. In addition, there were 8 cases of shared  
150 breakpoints between the Catalan *L. sinapis* and *L. juvernica* (Supplementary figure 8), which  
151 explain the majority of the remaining differences in chromosome numbers between Catalan  
152 and Swedish *L. sinapis*. Such shared breakpoints could either represent sorting of ancestral  
153 fissions, independent fissions at the same chromosome positions in Catalan *L. sinapis* and  
154 *L. juvernica*, or independent, identical fusions in *L. reali* and Swedish *L. sinapis*. If fusions  
155 tend to occur randomly, we expected that chromosome pairs that have fused independently  
156 in two different lineages could have different orientations. However, in all cases except one,  
157 where a small inversion was in close proximity to a breakpoint, the chromosomes were  
158 collinear between *L. reali* and Swedish *L. sinapis*, suggesting that the ancestral state has  
159 been retained in both species. The two *L. sinapis* populations also shared five ancestral  
160 fusions (Supplementary figure 7), but no shared fissions. In addition, four of the fissions  
161 identified in the Catalan *L. sinapis* were not present in the individual from Asturias  
162 (Supplementary figure 4). In *L. reali* we identified 21 fusions (Supplementary figure 9) and  
163 six fissions (Supplementary figure 10) in total. We cannot exclude that some of these events  
164 correspond to chromosome translocations rather than fissions and fusions, since all except  
165 one of the fissioned chromosomes also have been involved in fusions. Finally, in the  
166 comparison between *L. juvernica* on the one hand and *L. sinapis* / *L. reali* on the other, we  
167 found 51 chromosome breakpoints shared by *L. sinapis* / *L. reali* (fusion in *L. juvernica* or

168 fission in *L. sinapis* / *L. reali*) and 44 unique breakpoints in *L. juvernica* (fission in *L. juvernica*  
169 or fusion in *L. sinapis* / *L. reali*).

170

171 The extreme rate of chromosomal rearrangements observed within the *Leptidea* clade  
172 motivated further comparison to the ancestral Lepidopteran karyotype. We therefore tested  
173 how often coordinates of the previously identified chromosome breakpoints overlapped with  
174 breaks in synteny between *M. cinxia* and *Leptidea*. Synteny breaks were inferred when  
175 consecutive alignment blocks switched from one chromosome to another in *M. cinxia*. This  
176 analysis showed that 33 of the 37 fusions previously called in *L. sinapis* and *L. reali*  
177 overlapped with synteny breakpoints in *M. cinxia* (33 / 37 overlapping fusions is significantly  
178 different from a random genomic occurrence of overlaps; randomization test, p-value <  
179  $1.0 \times 10^{-5}$ ; Supplementary figure 11), verifying that these constitute novel rearrangements in  
180 *Leptidea*. The four exceptions included one fusion in *L. sinapis* and three fusions in *L. reali*.  
181 These cases could represent fissions in the ancestral *Leptidea* lineage followed by recurrent  
182 fusions in a specific species, or fissions that occurred independently in *L. juvernica* and *M.*  
183 *cinxia*. Three of 14 previously characterized fissions in *Leptidea* and four of 8 chromosome  
184 breakpoints shared between *L. juvernica* and Catalan *L. sinapis* overlapped synteny breaks  
185 in *M. cinxia* and therefore likely rather represent fusions in a *Leptidea* lineage than  
186 independent fissions in *M. cinxia* and one of the *Leptidea* species.

187

188 In cases where chromosome rearrangements within *Leptidea* were not supported based on  
189 homology information in *M. cinxia*, we analyzed the breakpoint regions for presence of  
190 telomeric repeats (TTAGG)<sub>n</sub> or (CCTAA)<sub>n</sub>, which should only be present if the rearranged  
191 region corresponds to a chromosome fusion. For the inferred fusion shared by both *L.*  
192 *sinapis* populations, we found telomeric repeats in both the Swedish and Catalan individuals,  
193 indicating that this represents a fusion back to the ancestral state. Conversely, the three  
194 fusions in *L. reali* did not contain any telomeric repeats which indicates that several fissions  
195 have occurred in the same chromosome region in different *Leptidea* lineages, or that

196 ancestral fission/fusion polymorphisms have sorted differently within the *Leptidea* clade.  
197 Regions around one fission in Catalan *L. sinapis* and two fissions in *L. reali* that were not  
198 supported by homology information in *M. cinxia* also lacked telomeric repeats in the other  
199 *Leptidea* lineages. These three fissions therefore likely occurred within regions that  
200 represent chromosome fusions that pre-date the radiation of the *Leptidea* clade. Finally, two  
201 of the four shared fission breakpoints between *L. juvernica* and Catalan *L. sinapis*, which  
202 were fusion-like compared to *M. cinxia*, did not contain telomeric repeats in the other  
203 *Leptidea* samples and therefore likely represent fissions. All inferred fission and fusion  
204 events are summarized in Figure 3 and Supplementary table 3. We further polarized the  
205 chromosome breakpoints identified between *L. juvernica* and the other *Leptidea* species.  
206 Here, 46 of 51 *L. reali* / *L. sinapis* chromosome breakpoints (fusion in *L. juvernica* or fission  
207 in *L. reali* / *L. sinapis*) and 16 of 44 breakpoints in *L. juvernica* (fission in *L. juvernica* or  
208 fusion in *L. reali* / *L. sinapis*) had overlapping synteny breaks in *M. cinxia*, indicating that the  
209 majority (65.3%) represent fusions that have occurred within the *Leptidea* clade. The  
210 directions and frequencies of chromosome rearrangements in the different lineages suggest  
211 that the common ancestor of the three investigated *Leptidea* species had a haploid  
212 chromosome number ( $n \sim 51-53$ ) close to that of present day Catalan *L. sinapis*.

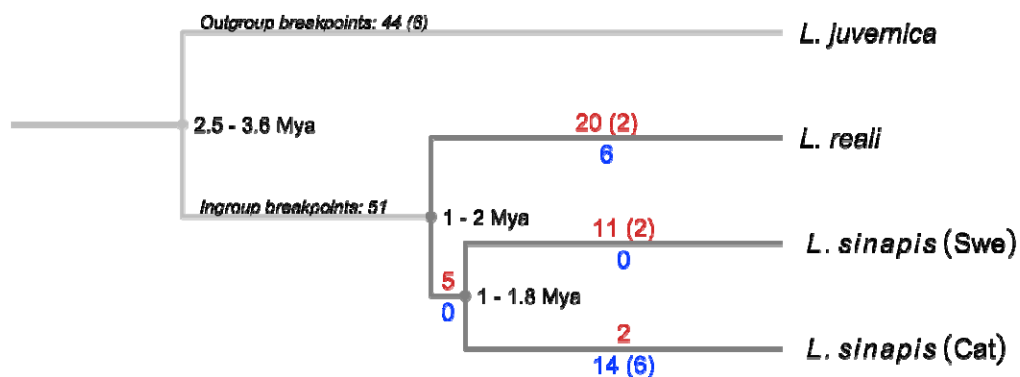

Figure 3. Estimated number of chromosomal rearrangement events in the different *Leptidea* species/populations. Fusions are highlighted in red and fissions in blue. Numbers show total counts

for each branch and shared events are shown in parenthesis. Divergence times are based on Talla et al. (2017).

213 Next, we estimated how much of the observed rearrangements could alternatively be the  
214 result of translocations. First, we checked for exchange of homologous regions between  
215 chromosomes and species, which could be an indication of reciprocal translocations. For the  
216 ingroup species (*L. sinapis* and *L. reali*) we only detected one such case in Catalan *L.*  
217 *sinapis* involving chromosomes 25 and 51. Next, we counted how often a chromosome  
218 region was flanked by regions from one other chromosome in another species which could  
219 indicate a non-reciprocal, internal translocation event. Here, we also only detected one case,  
220 in *L. reali* chromosome 20. Finally, since translocations do not necessarily affect  
221 chromosome ends, we counted how many ancestral chromosome ends (compared to *B.*  
222 *mori*) were still present in *Leptidea* and how many of these were kept as ancestral pairs. This  
223 showed that few ancestral chromosome ends are maintained (*L. juvernica*: 10/84, *L. reali*:  
224 7/52, Swedish *L. sinapis*: 11/56, Catalan *L. sinapis*: 18/104) and no ends remain paired in  
225 any of the species. Taken together, this suggests that translocations are rare and most  
226 rearrangements have occurred through fissions and fusions.

227

#### 228 *Intraspecific rearrangements*

229 The high frequency of interspecific chromosome rearrangements between *Leptidea* species  
230 spurred an additional set of analysis to assess occurrences and frequencies of fission /  
231 fusion polymorphisms segregating within the populations. While the physical assemblies of  
232 the male and female *L. reali* and Catalan *L. sinapis*, respectively, were collinear, we found  
233 evidence for fission / fusion polymorphisms segregating within both *L. sinapis* and *L.*  
234 *juvernica* (Supplementary figure 12). First, the Catalan (C) and Asturian (A) *L. sinapis*  
235 individuals, which presumably represent populations with recent shared ancestry, had highly  
236 similar karyotypes, but we found one fusion polymorphism (C 5 = A 6 + A 45; A 6 = C 5 + C  
237 51; Supplementary figure 4) and a potential translocation involving chromosomes C 6 and C

238 18 + A 10 and A 18, respectively (Supplementary figure 4). Second, within the Swedish *L.*  
239 *sinapis*, the comparison of the male and the female assemblies revealed two segregating  
240 chromosome fusions ( $\text{♀ chromosome } 3 = \text{♂ chromosomes } \text{♂ } 19 + \text{♂ } 25$ , and  $\text{♀ } 6 = \text{♂ } 21 + \text{♂}$   
241 28) (Supplementary figure 12 and 13) and two cases where the male and female were  
242 heterozygous for different rearrangement polymorphisms ( $\text{♀ } 4 = \text{♂ } 5 + \text{♂ } 27$ ;  $\text{♂ } 5 = \text{♀ } 4 + \text{♀}$   
243 27, and  $\text{♀ } 10 = \text{♂ } 11 + \text{♂ } 26$ ;  $\text{♂ } 11 = \text{♀ } 10 + \text{♀ } 26$ ) (Figure 4, Supplementary figure 12). In the  
244 first case ( $\text{♀ } 4 = \text{♂ } 5 + \text{♂ } 27$ ;  $\text{♂ } 5 = \text{♀ } 4 + \text{♀ } 27$ ), the fusion point between chromosomes  $\text{♀ } 4$   
245 and  $\text{♂ } 5$  appears to be associated with a large inversion (supported by the linkage map data,  
246 see below), which connects the fused variants in different orientations. To understand the  
247 background of these two complex rearrangement polymorphisms, we analyzed the  
248 homologous regions in the other *Leptidea* populations / species. For the first case, we found  
249 that *L. reali* shared the fusion variant observed in the *L. sinapis* female (i.e.  $\text{♀ } 4 = \text{♂ } 5 + \text{♂}$   
250 27; likely the ancestral state) while the Catalan and Asturian *L. sinapis* shared the variant  
251 observed in the Swedish *L. sinapis* male ( $\text{♂ } 5 = \text{♀ } 4 + \text{♀ } 27$ ), with an additional fission within  
252 the inverted region. In *L. juvernica*, the genomic regions involved in rearrangement  
253 polymorphisms in the Swedish *L. sinapis* were separate chromosomes. In the second case  
254 ( $\text{♀ } 10 = \text{♂ } 11 + \text{♂ } 26$ ;  $\text{♂ } 11 = \text{♀ } 10 + \text{♀ } 26$ ), both *L. reali* (chromosome 14) and *L. juvernica*  
255 (5) shared the variant observed in the Swedish *L. sinapis* male ( $\text{♂ } 11 = \text{♀ } 10 + \text{♀ } 26$ ) with  
256 several additional rearrangements around the fusion point. The constitution in Catalan and  
257 Asturian *L. sinapis* was also most similar to the variant observed in the Swedish *L. sinapis*  
258 male but with additional smaller rearrangements connected to it. Hence, the variant  
259 observed in the Swedish *L. sinapis* female ( $\text{♀ } 10 = \text{♂ } 11 + \text{♂ } 26$ ) appears to be specific to  
260 this population (Figure 4).

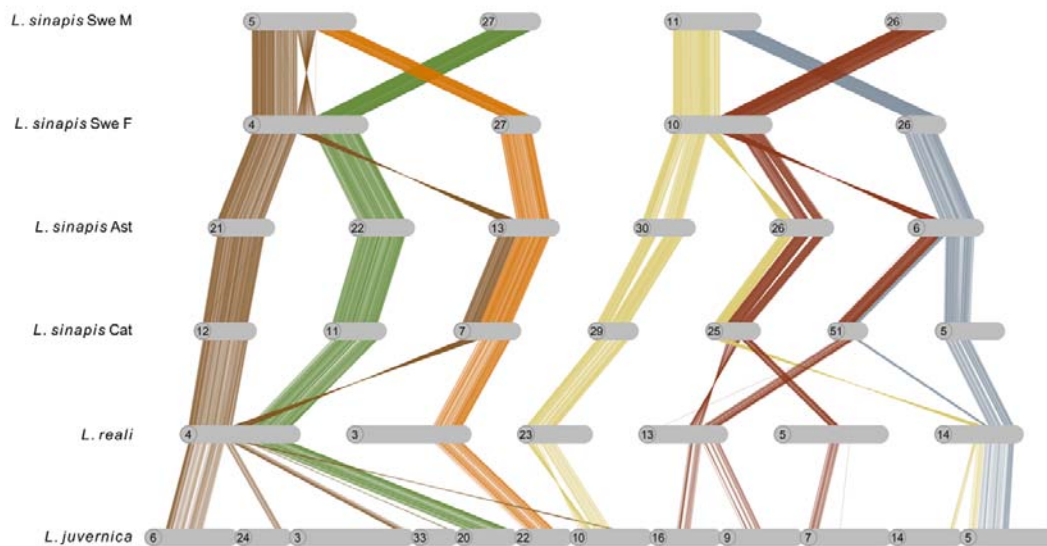

Figure 4. Fusion polymorphisms in Swedish *L. sinapis* and respective homologous regions in the other *Leptidea* species and populations. Lines show individual alignments (> 90% similarity) and colours represent homologous regions. Chromosomes have been rotated to enhance visualization. Note that chromosomes 26 and 27 are not homologous to the chromosome with the same number in the opposite sex in Swedish *L. sinapis*. Ast: Asturias population, Cat: Catalan population.

261 Finally, when comparing the male and the female *L. juvernica* assemblies, we also detected  
 262 three segregating fusions ( $\text{♀ } 5 = \text{♂ } 24 + \text{♂ } 25$ ;  $\text{♂ } 17 = \text{♀ } 28 + \text{♀ } 38$ ;  $\text{♂ } 41 = \text{♀ } 42 + \text{♀ } 43$ ;  
 263 supplementary figure 14) and one rearrangement polymorphisms;  $\text{♀ } 20 = \text{♂ } 27 + \text{♂ } 37$ ;  $\text{♂ } 27$   
 264  $= \text{♀ } 20 + \text{♀ } 40$ ; Supplementary figure 15).

265

266 The intraspecific chromosome rearrangement polymorphisms observed with the HiC-maps  
 267 obviously only reflects the variation between two individuals in each population. To provide  
 268 information from more individuals in each population and assess the frequency of  
 269 segregating rearrangement polymorphisms in more detail, we used the pedigrees to  
 270 construct single family based linkage maps in the populations with the largest difference in  
 271 chromosome count - the Swedish and the Catalan *L. sinapis*. This independent analysis  
 272 verified the observations from the HiC-maps, and revealed additional segregating

273 chromosome rearrangement polymorphisms. For the Swedish population, we could  
274 construct linkage maps for four independent families and they all had different karyotypes  
275 when compared to the Swedish *L. sinapis* male genome assembly. Family T4 had one of the  
276 chromosome fusions ( $\text{♂ } 21 + \text{♂ } 28$ ) and family T3 two additional fusions ( $\text{♂ } 27 + \text{♂ } 5$ ,  $\text{♂ } 11 +$   
277  $\text{♂ } 26$ ) that were observed when comparing the male and female genome assemblies. In  
278 family T5 we observed the same fusions as in family T3 but with additional fissions involving  
279  $\text{♂ } 7$  and  $\text{♂ } 11$ . Some of the previously identified fusions and the fission of chromosome  $\text{♂ } 7$   
280 were also observed in family T2. Hence, the linkage analysis in independent families  
281 confirmed the fission / fusion polymorphisms identified in the comparison between genome  
282 assemblies and revealed an additional fission of  $\text{♂ } 7$  in two families. For the Catalan families  
283 we could construct five independent maps. Here we observed three different karyotypes, all  
284 differing from the genome assembly of the Catalan *L. sinapis* male. A fission of chromosome  
285  $\text{♂ } 5$  was present in all families, similar to the observation in the Asturian *L. sinapis*. In three  
286 families, 3c9, 4C and 9C, we found a fusion of  $\text{♂ } 6 + \text{♂ } 18$  and in addition to  $\text{♂ } 6 + \text{♂ } 18$   
287 there was also one part of  $\text{♂ } 5$  fused to  $\text{♂ } 45$  in family C9. In summary, the genetic maps for  
288 independent families provide evidence for several chromosome rearrangement  
289 polymorphisms that are currently segregating in the different populations (Figure 5).

a)

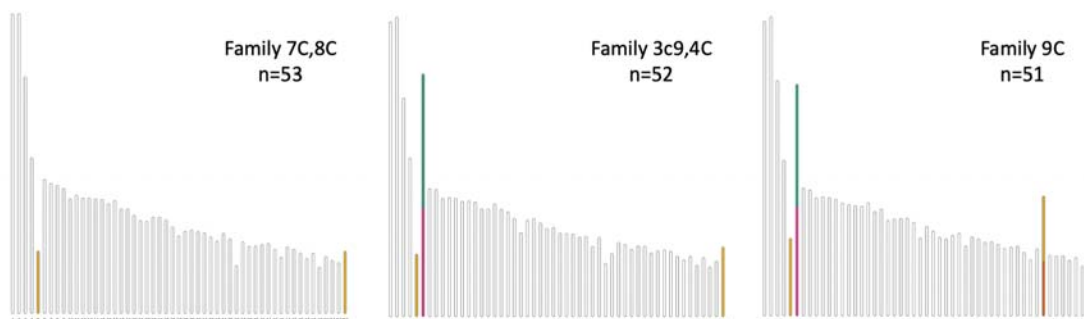

b)



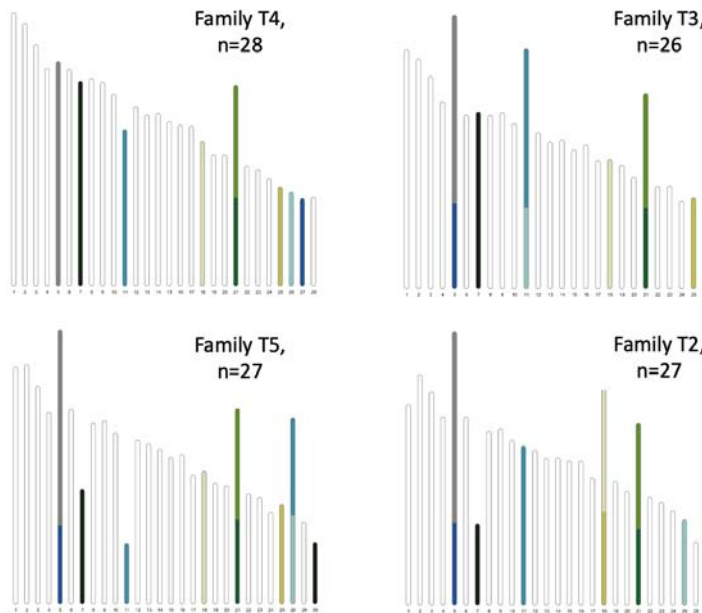

Figure 5. Linkage groups for a) Swedish families and b) Catalan *L. sinapis* families. Colours represent specific chromosomes in the male genome assembly for the Swedish ( $n = 26 - 28$ ) and Catalan ( $n = 51 - 53$ ) *L. sinapis* population, respectively.

## 290 Structural variation in the sex chromosomes

291 The synteny of the Z chromosomes agreed with previous results (Yoshido et al., 2020) and  
292 in addition we detected previously unknown gene movement from *B. mori* autosomes 19, 26  
293 and 28 to the sex chromosomes in *Leptidea* (Supplementary figure 16). In *L. sinapis*, we  
294 identified the three previously described Z chromosomes and a female specific ~ 4.4 Mb  
295 long scaffold, which likely represents (at least part of) the W chromosome. No equivalent W  
296 scaffold was observed in the Catalan *L. sinapis* female assembly. We noticed however that  
297 Z chromosome 3 in the two female *L. sinapis* assemblies and Z chromosome 1 in *L. reali*  
298 were several Mb longer than their male homologs and that they aligned less well compared  
299 to other chromosomes, indicating that these scaffolds likely are chimeras between the Z and  
300 W chromosome parts. In *L. reali*, we also discovered a previously unknown translocation  
301 event between what has previously been identified as Z chromosome 1 and Z chromosome  
302 3 (Yoshido et al., 2020; Supplementary figure 16). One of these lineage specific Z  
303 chromosomes contains a major part of the ancestral Z which has fused with Z chromosome

304 3. The other contains the remaining ancestral and neo parts of Z chromosome 1. This was  
305 observed in both the male and the female.

306

### 307 *Sequence analysis of the fissioned and fused chromosome regions*

308 In agreement with previous data (Talla et al., 2017), we found that the TE content was >  
309 50% in all *Leptidea* assemblies (Table 1) and the majority of the TEs were long interspersed  
310 nuclear elements (LINEs; Supplementary figure 17). Since TEs may facilitate structural  
311 rearrangements (Miller & Capy, 2004), we assessed potential associations between specific  
312 sequence motifs and rearrangements by estimating the density of different repeat classes  
313 and coding sequences in the chromosome regions associated with fusions and fissions and  
314 comparing the densities to genomic regions not affected by rearrangements. We limited this  
315 analysis to *L. reali* and *L. sinapis* where we could polarize the rearrangements as fissions or  
316 fusions. In chromosome regions where fusions have occurred, there was a significant  
317 enrichment of both LINEs and LTRs ( $p$ -value  $< 2.0 \times 10^{-5}$  in both cases), and a significant  
318 underrepresentation of SINEs ( $p$ -value  $< 2.0 \times 10^{-5}$ ) and rolling-circle TEs ( $p$ -value =  $1.0 \times 10^{-3}$ ).  
319 Similarly, there was a significant enrichment of LINEs and a reduction in SINEs and rolling-  
320 circles ( $p < 2.0 \times 10^{-5}$  in all cases) in chromosome ends in the lineages that lacked the fusion  
321 (queries), but in these regions LTRs were not significantly enriched (Figure 6A,  
322 Supplementary table 4). This shows that LTRs are more abundant where a fusion has  
323 occurred compared to homologous regions in species where a fusion has not taken place. In  
324 fission breakpoints in contrast, the only significant difference ( $p = 0.04$ ) was found for rolling-  
325 circles, which were underrepresented in fissioned as compared to non-fissioned  
326 chromosomes (Figure 6B, Supplementary table 4).

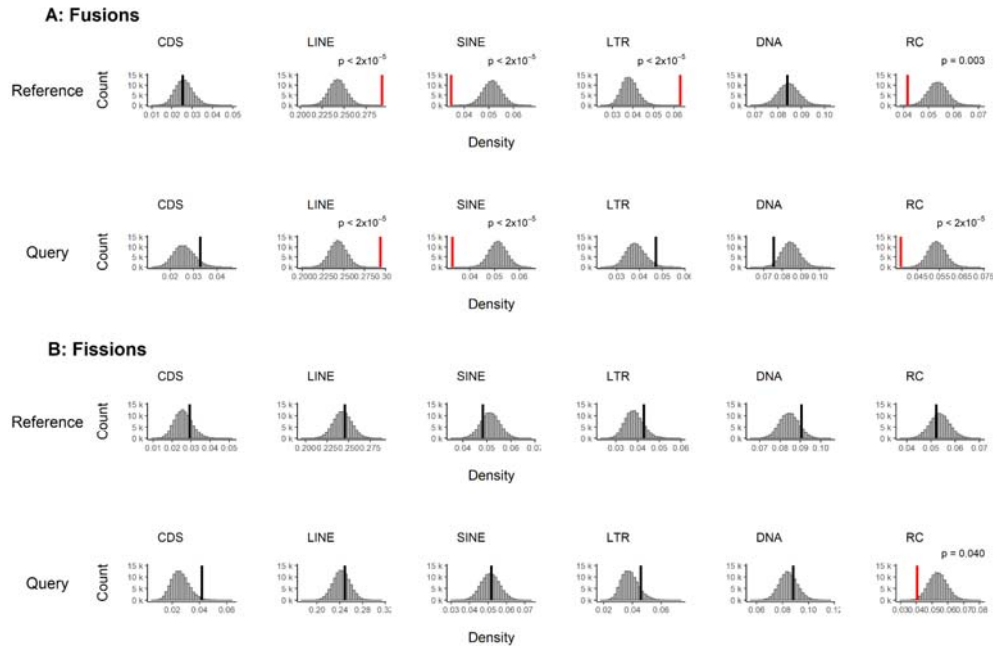

Figure 6. Composition of sequence elements in A) fusion and B) fission breakpoints as compared to the rest of the genomes for *L. reali* and *L. sinapis* (the outgroup *L. juvernica* was excluded from the analysis). Comparisons were performed separately for when the species were used as references or queries. The histograms show distributions of element densities generated by 100 k iterations of random genomic sampling with replacement. Vertical lines show mean density of elements in breakpoints, highlighted in red if significant and black if non-significant. FDR-adjusted *p*-values are indicated for significant tests. All *p*-values, means and standard deviations are reported in Supplementary table 4. CDS = coding sequence, LINE = long interspersed elements, SINE = short interspersed elements, LTR = long terminal repeats, DNA = DNA transposons, RC = rolling-circle TEs.

327 We found that the Asturian *L. sinapis* assembly contained more copies of the short telomeric  
 328 repeat (TTAGG)<sub>n</sub> compared to the in-house developed assemblies, and that these were  
 329 interspersed with certain LINE families. We therefore assessed if increased LINE content in  
 330 fused chromosome regions could be explained by the presence of telomere associated  
 331 LINEs. Two classes of telomere associated LINEs had a higher frequency in telomeric  
 332 regions than in the rest of the genome in the Asturian genome assembly (Fisher's exact test,  
 333 *fdr*-adjusted *p*-value < 2.0\*10<sup>-57</sup>, Supplementary table 5). However, these LINE classes  
 334 made up only 5.47% of the total LINE content in fused chromosome regions in *Leptidea*, and

335 LINEs in general were still significantly enriched ( $p$ -value =  $8.0 \times 10^{-4}$ ) in those regions after  
336 excluding this subset.

337

## 338 Discussion

339 Here we present the results from an integrative approach, where we combine genome  
340 assembly and annotation with traditional linkage mapping, to characterize and quantify the  
341 directions and frequencies of large scale chromosome rearrangements in *Leptidea*  
342 butterflies. Our data showed lineage specific patterns of fissions, fusions (and potentially  
343 some translocations) and unveiled considerable directional variation in karyomorph change  
344 across species and populations. We also identified several segregating fission / fusion  
345 polymorphisms in the *Leptidea* populations and characterized specific repeat classes  
346 associated with chromosome regions involved in rearrangements. Since the extensive  
347 rearrangements have occurred over a comparatively short time scale in *Leptidea* (Talla et  
348 al., 2017), the system provides a unique opportunity for investigating the causes and  
349 consequences of rapid karyotype change in recently diverged species.

350

351 Based on current chromosome number variation within *Leptidea* and the observation that the  
352 inferred ancestral karyotype ( $n = 31$ ) has been conserved across many divergent  
353 lepidopteran lineages (de Vos et al., 2020; Robinson, 1971), a straightforward expectation  
354 would be that *L. reali* ( $n = 25 - 28$ ) and the northern populations of *L. sinapis* ( $n = 28 - 29$ )  
355 have, apart from a few fusion events, mainly retained the ancestral lepidopteran  
356 chromosome structures. This would mimic the rearrangements observed for *H. melpomene*,  
357 where 10 fusions have reduced the chromosome number ( $n = 21$ ) compared to the ancestral  
358 karyotype (Davey et al., 2016). In line with this reasoning, the higher number of  
359 chromosomes in *L. juvernica* ( $n = 38 - 46$ ) and Iberian *L. sinapis* ( $n \approx 53 - 55$ ) could simply

360 be a consequence of chromosomal fissions, as observed in the lycaenid genus *Lysandra*  
361 (Pazhenkova & Lukhtanov, 2022). However, analogous to the organization of the genome  
362 structure in *P. napi* and *P. rapae* (Hill et al., 2019), our analyses reveal considerably more  
363 complex inter- and intra-chromosomal rearrangements in *Leptidea* than anticipated from  
364 comparisons of chromosome counts. These results confirm previous findings of a dynamic  
365 karyotype evolution in general in the species group (e.g. Dincă et al., 2011; Lukhtanov et al.,  
366 2011; Šíchová et al., 2015; Yoshido et al., 2020) and extends them by characterizing the  
367 specific chromosome rearrangements in detail and quantifying the differences in fission and  
368 fusion rates in different *Leptidea* species and populations. Despite the rather complex  
369 patterns of restructuring observed, we found some general trends of karyotype change  
370 between the species. For *L. reali* and the Swedish *L. sinapis* population, most species-  
371 specific chromosomes have been formed from fusions of chromosomes that segregate  
372 independently in Catalan *L. sinapis*. In Catalan *L. sinapis* on the other hand, lineage specific  
373 chromosomes have mainly formed through fissions of larger ancestral chromosomes. Since  
374 *L. juvernica* was used as an outgroup in the analysis, we could not infer direction in this  
375 lineage. However, comparisons with more divergent lepidopteran species suggest that both  
376 fissions and fusions have occurred at a high rate also in *L. juvernica*.

377

378 Our analyses show that the synteny blocks are short between *Leptidea* and the inferred  
379 ancestral karyotype - typically less than 1 Mb, which translates to 12 - 15 blocks per  
380 chromosome. Albeit less extensive, such a pattern has also been observed in *Pieris* sp. and  
381 has been suggested to reflect a history of recurrent reciprocal chromosome translocations  
382 (Hill et al., 2019). The synteny comparison between *Leptidea* species and *B. mori* showed  
383 that not a single chromosome in any *Leptidea* species has retained both chromosome ends  
384 and that only a minor fraction (~ 12 - 19%) have retained one of the ancestral ends. We also  
385 detect few signs of translocations and the high degree of synteny fragmentation in *Leptidea*  
386 is therefore probably a consequence of recurrent fissions and fusions in different  
387 chromosome regions and between different chromosome pairs, respectively.

388

389 The short synteny blocks also show that extensive chromosomal restructuring has occurred  
390 in the ancestral lineage of the *Leptidea* species included in our analyses and continued at a  
391 high rate in all species. Although we did not have data for all species in the genus, the  
392 inferred ancestral karyomorph of the analyzed species ( $n \sim 50$ ) in combination with the high  
393 and variable chromosome numbers in more divergent *Leptidea* species - *L. amurensis* ( $n =$   
394  $59 - 61$ ), *L. duponcheli* ( $n = 102 - 104$ ) and *L. morsei* ( $n = 54$ ) (Robinson, 1971; Šíchová et  
395 al., 2016) - suggest that a high chromosome rearrangement rate is ubiquitous in wood  
396 whites. In *L. reali* for example, the chromosome count has decreased to  $n = 26$  in 1 - 2 My  
397 since the split from *L. sinapis* (Talla et al., 2017). Even more striking is the rate of change in  
398 *L. sinapis* where chromosome counts range from  $n = 27 - 55$  between recently diverged  
399 populations. This translates to a chromosome number evolutionary rate in both *L. sinapis*  
400 and *L. reali* that has been considerably faster than in for example *H. melpomene*, where 10  
401 chromosome fusions have occurred over the last six million years (Davey et al., 2016).  
402 Additional support for an extreme rearrangement rate in the genus comes from the  
403 observations that several intraspecific fission / fusion polymorphisms are currently  
404 segregating within the different species (see also Lukhtanov et al., 2011; Šíchová et al.,  
405 2015) and that incomplete lineage sorting and / or recurrent rearrangements involving the  
406 same chromosome regions have been frequent in *Leptidea* historically.

407

408 Lepidoptera has traditionally been viewed as having a conserved genomic synteny.  
409 However, recent studies (Hill et al., 2019; Yoshido et al., 2020) and the results presented  
410 here add some doubt to this view. As mentioned above, an elevated rate of chromosome  
411 rearrangements has for example also been observed in the *Pieris napi / rapae* lineage (Hill  
412 et al., 2019), which belongs to the same family as *Leptidea* (Pieridae), but the two genera  
413 diverged approximately 80 Mya (Espeland et al., 2018) and our synteny analysis clearly  
414 show that the rearrangements have occurred independently. Given the limited availability of  
415 high-contiguity genome assemblies and / or high-resolution linkage maps, a more holistic

416 view of inter- and intra-chromosomal rearrangement rates will have to await broader  
417 taxonomic sampling. Still, we can ask why some lepidopteran taxa are extremely conserved  
418 in terms of karyotype and synteny, while other lineages have accumulated a large number of  
419 fissions, fusions and translocations, and also why some chromosomes are more conserved  
420 than others. Holocentricity and female achiasmy may facilitate segregation and retention of  
421 polymorphic chromosomes (Melters et al., 2012), and consequently accelerate genome  
422 restructuring. However, a recent phylogenetic overview in insects showed that karyotype  
423 evolution is not accelerated in clades with holocentric chromosomes as compared to  
424 monocentric, although Lepidoptera appears to be an exception with higher rates of both  
425 fissions and fusions (Ruckman et al., 2020). Inverted (post-reductional) meiosis is another  
426 mechanism proposed to be important for mitigating the negative effects of chromosomal  
427 heterozygosity (Lukhtanov et al., 2018). Within Lepidoptera, this phenomenon has been  
428 observed in *L. sinapis* (Lukhtanov et al., 2018) and facultatively in *B. mori* (Banno et al.,  
429 1995) and *Polyommatus poseidonides* (Lukhtanov et al., 2020), but because of its  
430 association with holocentric chromosomes (Melters et al., 2012) it could potentially be more  
431 widespread. However, why do we not observe an elevated rate of chromosome  
432 rearrangements in butterflies and moths in general? *Bombyx mori*, for example, has a similar  
433 repeat density as *Leptidea* (Tang et al., 2021) and shares the potential for inverted meiosis  
434 (Banno et al., 1995). Still *B. mori*, and the majority of lepidopteran taxa with chromosome  
435 structure information, have retained the ancestral lepidopteran karyotype (Ahola et al., 2014;  
436 Pringle et al., 2007). One option is that chromosome rearrangements are dependent on the  
437 presence of specific features that generate *de novo* rearrangement mutations - i.e. that the  
438 rate of structural change is mutation limited. Within *Leptidea* for example, a relatively recent  
439 burst of transposable element activity has occurred (Talla et al., 2017). This increased  
440 activity of certain TE classes could potentially be an important driver of genomic  
441 restructuring. We found for example increased LINE and LTR density in fused chromosome  
442 regions. Previous data suggest that LINEs make up a considerable portion of the telomere  
443 regions in Lepidoptera (Okazaki et al., 1995; Takahashi et al., 1997), but the specific class

444 we could associate with telomeres in *Leptidea* could not explain the general enrichment of  
445 LINEs in fused regions. LINEs have previously been associated with rearrangements in  
446 monocentric organisms, for example bats (Sotero-Caio et al., 2015) and gibbons (Carbone  
447 et al., 2014). Enrichment of LINEs and LTRs was similarly shown to occur in synteny  
448 breakpoints within the highly rearranged genome of the aphid *Myzus persicae* (Mathers et  
449 al., 2021), although in this case several other classes of TEs were also overrepresented. A  
450 plausible explanation is that an increase in ectopic recombination between similar copies of  
451 specific TE repeat classes located on different chromosomes (Almojil et al., 2021) can lead  
452 to rearrangements, but only in species where these specific classes have proliferated  
453 recently. In *Heliconius*, for example, there is a higher density of TEs in general in  
454 chromosome fusion points (Cicconardi et al., 2021). Here, we found that the enrichment of  
455 LINEs was significant both in species / regions where a chromosome fusion has taken place  
456 and in homologous chromosome regions in species where the fusion event has not  
457 occurred. This shows that the density of LINEs has been higher in chromosome regions  
458 where fusions have occurred rather than accumulating in the regions after the fusion event  
459 and indicates that recently proliferated LINE families could play an important role for  
460 rearrangements in *Leptidea*. However, we found no association between any of the  
461 investigated genomic features and chromosome fission events which indicates that  
462 chromosome breakage depends on a mechanism that we could not pick up with our data.

463

464 Although *Leptidea* has the most rearranged sex chromosomes of any Lepidopteran species  
465 described so far (Yoshido et al., 2020), our synteny analysis showed that the Z  
466 chromosomes are considerably more structurally conserved than the autosomes. In  
467 particular Z2, which is the only chromosome that has been completely conserved since the  
468 split of the *Leptidea* species. The gene content of the ancestral Z chromosome has also  
469 been maintained, although the gene order has been highly reshuffled from the ancestral  
470 state. A similar situation of sex chromosome conservation in the face of extensive genome  
471 restructuring was recently shown in the aphid *M. persicae* (Mathers et al., 2021) and the Z



472 chromosome is highly conserved in Lepidoptera (Fraïsse et al., 2017; Sahara et al., 2012),  
473 even in rearranged genomes (Hill et al., 2019), but several cases of fusions with autosomes  
474 have been documented (Hill et al., 2019; Mongue et al., 2017; Nguyen et al., 2013). In  
475 systems where one sex chromosome is degenerated, for example the W chromosomes in  
476 lizards (Iannucci et al., 2019), snakes (Rovatsos et al., 2015) and butterflies (Lewis et al.,  
477 2021), the other sex-chromosome (here Z-chromosomes) is often highly conserved. One  
478 potential explanation for this is that translocation of genes with male-biased expression from  
479 the Z chromosome to an autosome likely would have deleterious effects in females (Vicoso,  
480 2019). It has also been proposed that selection for maintaining linkage of genes with sex-  
481 biased expression can be a strong stabilizing force, as seen for example in birds (Nanda et  
482 al., 2008). Accumulation of male biased genes on the Z chromosome, as has been observed  
483 in many lepidopteran species (Arunkumar et al., 2009; Mongue & Walters, 2018) including *L.*  
484 *sinapis* (Höök et al., 2019), can therefore be a potential reason for the much more conserved  
485 Z chromosomes. The fact that the Z chromosome only recombines and spends relatively  
486 more time in male butterflies (Turner & Sheppard, 1975) should further strengthen this  
487 linkage. Translocation of genes from the sex chromosomes might also be selected against if  
488 it alters expression levels regulated by dosage compensation mechanisms, which has been  
489 observed in *L. sinapis* (Höök et al., 2019).

490

## 491 Conclusion

492 Here we present female and male genome assemblies for three different *Leptidea* species  
493 and develop detailed linkage maps for two populations of *L. sinapis*. Synteny analysis  
494 revealed one of the most dramatic and rapid cases of chromosome evolution presented so  
495 far. The genus not only has one of the most variable intra- and interspecific chromosome  
496 numbers, but also, as shown here, potentially the most rearranged genomes across  
497 Lepidoptera. Our data suggests that fissions and fusions have been the main cause of the  
498 restructuring and that several rearrangement polymorphisms still segregate in the different

499 species and populations. We further find an association between LINEs and LTR elements  
500 and fusion breakpoints which should be explored in more depth in future studies. The results  
501 presented here add another example of extensive genome reshuffling in Lepidoptera, which  
502 shows that the karyomorph does not necessarily predict the extent of chromosome  
503 rearrangements in a species.  
504

## 505 Methods

### 506 *Samples*

507 Mated adult females of *L. sinapis* (Sweden and Catalonia), *L. reali* (Catalonia) and *L.*  
508 *juvernica* (Sweden) were sampled in the field 2019 and kept in the lab for egg laying. One  
509 male and one female offspring from each dam were sampled at the chrysalis stage and flash  
510 frozen in liquid nitrogen. Each sample was divided in two aliquots to allow for generation of  
511 both a 10X Genomics Chromium Genome- and a Dovetail HiC-library from each individual.  
512 For 10X sequencing, DNA was extracted using a modified high molecular weight salt  
513 extraction method (Aljanabi & Martinez, 1997). Tissues were homogenized for HiC  
514 sequencing using a mortar and pestle in liquid nitrogen and sent to the National Genomics  
515 Infrastructure (NGI, Stockholm) for library preparation and sequencing.

516

### 517 *Sequencing and assembly*

518 Library preparations, sequencing and genome assembly was performed by NGI Stockholm  
519 using the Illumina NovaSeq6000 technology with 2 x 151 bp read length. 10X linked reads  
520 were assembled with 10X Genomics Supernova v. 2.1.0 (Weisenfeld et al., 2017). HiC reads  
521 were processed with Juicer v. 1.6 (Durand et al., 2016a) and assemblies were scaffolded  
522 with 3DDNA v.180922 (Dudchenko et al., 2017). Resulting assemblies were corrected in  
523 several consecutive steps with Juicebox v. 1.11.08 (Durand et al., 2016b). First, all obvious  
524 scaffolding errors were corrected using the HiC contact information. Next, linkage

525 information (see subheading “Linkage maps”) was used to identify and correct technical  
526 inversions and translocations in the *L. sinapis* assemblies. Finally, we used pairwise  
527 alignments (see Genome alignments) between i) the male and female from each respective  
528 population, and ii) all assemblies, including an assembly of an Asturian *L. sinapis* individual  
529 from the Darwin Tree of Life (DToL) initiative (Lohse et al., 2022), and used visual inspection  
530 to detect deviating scaffold orders or orientations. Manual corrections were done in cases  
531 when the orientation was not in conflict with the HiC-signal (Supplementary figure 1). After  
532 manual curation, the number of chromosome sized scaffolds for each assembly (Swedish *L.*  
533 *sinapis* n = 28 - 29, Catalan *L. sinapis* n = 52, *L. reali* n = 26, *L. juvernica* n = 42 - 43) was  
534 within the expected karyotype range (Dincă et al., 2011; Lukhtanov et al., 2011; Šíchová et  
535 al., 2015) and these scaffolds contained the majority of the total sequence content (Table 1,  
536 Supplementary figure 1 and 2). In addition, collinearity between male and female assemblies  
537 improved after manual curation (Supplementary figure 12). Redundant scaffolds (100%  
538 identical duplicates and scaffolds contained within others) were removed using ‘dedupe.sh’  
539 in BBTools v. 38.61b (Bushnell, 2019). The core gene completeness of the different  
540 assemblies was assessed with BUSCO v. 3.0.2 (Simão et al., 2015) using the insecta\_odb9  
541 data set. The percent of complete BUSCO insect orthologs ranged between 93.4% in *L. reali*  
542 male to 95.0% in *L. juvernica* male (Table 1, Supplementary table 1). Potential contaminant  
543 scaffolds were identified and removed using BlobTools v. 1.1.1 (Laetsch & Blaxter, 2017).

544

## 545 Linkage map

### 546 *Sampling, DNA-extraction and sequencing protocol*

547 Offspring from wild caught females from two populations of *L. sinapis* with different  
548 karyotypes (Sweden n = 28 - 29; Catalonia n = 53 - 55) were reared on cuttings of *Lotus*  
549 *corniculatus*. The pedigrees consisted of 6 dams and 184 and 178 offspring from the  
550 Swedish and Catalan population, respectively (Supplementary table 6). The offspring were  
551 sampled at larval instar V, snap frozen in liquid nitrogen and stored at -20°C. DNA-

552 extractions from caudal abdominal segments were performed with a modified Phenol-  
553 Chloroform extraction (batch1; Sambrook & Russell, 2006) or high salt extraction (batch2;  
554 Aljanabi & Martinez, 1997) after standard Proteinase-K digestion overnight. The amount and  
555 quality of the DNA was analyzed with Nanodrop (Thermo Fisher Scientific) and Qubit  
556 (Thermo Fisher Scientific). The DNA was digested with the *EcoR1* enzyme according to the  
557 manufacturer's protocol, using 16 hours digestion time (Thermo Fisher Scientific). The  
558 efficiency of the digestion was determined by visual inspection of the fragmentation using gel  
559 electrophoresis (1% agarose gel). The fragmented DNA samples were sent for RAD-seq  
560 library preparation and paired-end sequencing on Illumina HiSeq2500 (batch 1) and  
561 NovaSeq600 (batch 2) at the National Genomics Infrastructure, SciLife, Stockholm.

562

### 563 *Data processing*

564 The quality of the raw reads was initially assessed with FastQC (Andrews, 2010). Duplicate  
565 removal and quality filtering were performed with `clone_filter` and `process_radtags` from  
566 `Stacks2` (Catchen et al., 2013). We applied the quality filtering options `-q` to filter out reads  
567 with `> phred score 10` (90% probability of correct base called) in windows 15% of the length  
568 of the read, `-c` to remove all reads with unassigned bases, and `--disable_rad_chec` to keep  
569 reads without complete RAD-tags. All reads were truncated to 120 bp. The filtered reads  
570 were mapped to the male genome assembly from each population using `bwa mem` with  
571 default options, and sorted with `samtools sort` (Li et al., 2009). The bam-files were further  
572 filtered with `samtools view -q 30` option and a custom script to only retain reads with unique  
573 mapping positions. The mapping coverage was analyzed with `Qualimap` (Okonechnikov et  
574 al., 2016) and individual coverage was visualized as mean coverage per chromosome  
575 divided by mean coverage per individual. The sex of offspring was set as female if the  
576 normalized coverage on the Z1- and Z2-chromosomes was `< 75%` compared to the  
577 autosomes. We used `Samtools mpileup` for variant calling with minimum mapping quality (`-q`)  
578 10 and minimum base quality (`-Q`) 10 (Li, 2011). The variants were converted to likelihoods  
579 using `Pileup2Likelihoods` in `LepMap3` with default settings (Rastas, 2017), minimum

580 coverage 3 per individual (`minCoverage = 3`) and 30% of the individuals allowed to have  
581 lower coverage than minimum coverage (`numLowerCoverage = 0.3`). To verify that the  
582 pedigree was correct, the relatedness coefficients of the samples were estimated with the  
583 module IBD in LepMap3 using 10% of the markers and a multiple dimensional  
584 scaling/principal coordinate analysis based on a distance matrix inferred with Tassel 5 v.  
585 20210210 (Bradbury et al., 2007).

586

### 587 *Linkage map construction*

588 LepMap3 was used to construct the linkage maps (Rastas, 2017). Informative parental  
589 markers were called with module ParentCall using default values, except that non-  
590 informative markers were removed and we applied the setting `zLimit = 2` to detect markers  
591 segregating as sex chromosomes. This module also uses genotype likelihood information  
592 from the offspring to impute missing or erroneous parental markers. Markers that did not  
593 map to the chromosome-size scaffolds in the physical assembly were removed. The module  
594 Filtering2 was applied to remove markers with high segregation distortion (`dataTolerance =`  
595 `0.00001`) and markers that were missing in more than 30% of the individuals in each family  
596 (`missingLimit = 0.3`). In addition, only markers present in at least five families were retained  
597 (`familyInformativeLimit = 5`). The markers were binned over stretches of 10 kb with a custom  
598 script and binned markers with more than five SNPs per bin were removed. The module  
599 OrderMarkers2 with the option `outputPhasedData = 4` was used to phase all binned data.  
600 The final binning and filtering resulted in 3,237 and 4,207 retained markers in the Swedish  
601 and Catalan pedigree, respectively.

602

603 The markers were assigned to linkage groups using the module SeparateChromosomes2,  
604 with an empirically estimated `lodLimit`. The `lodLimit` is the threshold for the logarithm of the  
605 odds that two markers are inherited together (LOD-score), i.e. belonging to the same linkage  
606 group. We evaluated a range of `lodLimits` (1 - 30) and finally set it to 10 for the Catalan and  
607 12 for the Swedish families - settings that resulted in approximately the number of linkage

608 groups expected from karyotype data (50 linkage groups in the Catalan and 23 linkage  
609 groups in the Swedish families, respectively). To assign additional unlinked markers to the  
610 linkage groups, JoinSingles was run with lodLimits 5 for the Catalan map and 8 for the  
611 Swedish. Since butterflies have female heterogamety and female achiasmy, the three  
612 different Z-chromosomes were clustered in one linkage group and had to be split in separate  
613 linkage groups manually (based on information from the physical genome assemblies). To  
614 correct for interference and multiple recombination events per linkage group we applied the  
615 Kosambi correction. To account for female achiasmy, the recombination rate in females was  
616 set to zero (recombination2 = 0). The linkage maps were refined by manually removing non-  
617 informative markers at the ends of each map. The trimmed map was re-evaluated with  
618 OrderMarkers with the options evaluateOrder and improveOrder = 1. Remaining unlinked  
619 markers at map ends were manually removed after visual inspection and the maps were  
620 once again re-evaluated with OrderMarkers. The genetic distances and marker orders were  
621 compared to the physical positions along each chromosome and the physical coordinates for  
622 potential rearrangements were used for re-evaluation of the HiC-maps (Figure 1). The  
623 collinearity of the genetic and physical maps was assessed using Spearman's rank  
624 correlation.

#### 625 *Read mapping*

626 10X raw reads were first processed with Long ranger basic v. 2.2.2 (Marks et al., 2019).  
627 Reads were then trimmed for low quality bases and adapters with Cutadapt v. 2.3 (Martin,  
628 2011) in TrimGalore v. 0.6.1 (Krueger, 2019) using the NovaSeq filter (--nextseq 30) and  
629 discarding trimmed reads shorter than 30 bp. Fastqscreen v. 0.11.1 (Wingett & Andrews,  
630 2018) was used to screen and filter libraries from common contaminants (*A. thaliana*, *D.*  
631 *melanogaster*, *E. coli*, *S. cerevisiae*, *H. sapiens*, *C. familiaris*, *M. musculus*, *Wolbachia* and  
632 *L. corniculatus*, downloaded from NCBI 2021-03-05). Reads were mapped with BWA mem v.  
633 0.7.17 (Li, 2013) resulting in a high mapping rate across all assemblies (98.0 - 98.6 %; Table  
634 1). Mapped reads were then filtered for supplementary and secondary alignments with a

635 custom script, and low-quality alignments (mapq < 30) with samtools v1.10 (Li et al., 2009).  
636 Duplicate reads were removed using MarkDuplicates in GATK v. 4.1.1.0 (McKenna et al.,  
637 2010). Resulting read mappings were assessed with samtools flagstats (Li et al., 2009) and  
638 QualiMap v. 2.2 (Okonechnikov et al., 2016).

639

#### 640 *MtDNA*

641 Circularized mitochondrial genomes for each sample were assembled de novo from  
642 processed 10X reads using NOVOplasty v. 4.2 (Dierckxsens et al., 2017) with the *COX1*  
643 gene from *Leptidea morsei* as seed (downloaded from NCBI 2020-08-29). The mitochondrial  
644 genomes were annotated with MITOS (Bernt et al., 2013), using custom scripts to set the  
645 gene *TRNM* as starting position. To identify and remove partial mtDNA scaffolds from the  
646 nuclear genome assemblies, we aligned the mtDNA genomes to the assemblies with  
647 nucmer in MUMmer v. 4.0.0rc1 (Marçais et al., 2018) using default settings and filtering the  
648 output with delta-filter -g. Scaffolds aligning by > 95% of their length and with > 95% identity  
649 were filtered out using a custom script. After filtering away identified partial mtDNA scaffolds  
650 we reintroduced the mtDNA as a separate scaffold to each assembly.

651

#### 652 *Sex chromosome identification*

653 Sex chromosomes were identified by homology and read coverage. We used gene synteny  
654 (see synteny analysis) between *B. mori* and the sequenced *Leptidea* species to verify  
655 previously characterized sex and neo-sex chromosomes (Yoshido et al., 2020). As an  
656 independent validation we analyzed read depth (see read mapping) for chromosome sized  
657 scaffolds across the female and male assemblies with QualiMap v. 2.2 (Okonechnikov et al.,  
658 2016). For scaffolds identified as sex chromosomes, the mean read coverage in females  
659 ranged between 49.36 - 74.44% of mean assembly coverage (Supplementary table 7,  
660 Supplementary figure 18). Sex chromosomes were also verified visually in non-normalized  
661 HiC heatmaps, where female samples had a clearly reduced contact between identified sex

662 chromosomes and autosomes (Supplementary figure 1) as compared to the background  
663 noise.

664

#### 665 *Gene and repeat annotation*

666 Repeat libraries were generated *de novo* with RepeatModeler v. 1.0.11 (Smit & Hubley,  
667 2017) using default settings. Repeat families classified as unknown by RepeatModeler were  
668 additionally screened against Repbase (Jurka, 1998) using CENSOR (Kohany et al., 2006)  
669 with the options 'sequence source - Eukaryota' and 'report simple repeat'. The highest  
670 scoring hit for each query was integrated with the RepeatModeler output using custom  
671 scripts. Repeats were then annotated and quantified using RepeatMasker v. 4.1.0 (Smit et  
672 al., 2019). Genes were annotated for the male genome assemblies of each species with the  
673 MAKER pipeline v. 3.01.04 (Cantarel et al., 2008). First, both translated protein and coding  
674 nucleotide sequences were used as input evidence. Protein sequences were a combination  
675 of previous *L. sinapis* annotations (Talla et al., 2019), reviewed Lepidoptera proteins from  
676 uniprot (downloaded 2021-04-02) and a set of Lepidoptera core orthologs from Kawahara &  
677 Breinholt, 2014. Coding sequences were a combination of *L. sinapis* (Talla et al., 2019) and  
678 *L. juvernica* (Yoshido et al., 2020) transcripts. In addition, the output of RepeatModeler was  
679 used to mask repeat sequences within MAKER. Resulting gene models were used to train  
680 *ab initio* gene predictors in snap (Korf, 2004) and Augustus v. 3.4.0 (Stanke et al., 2008).  
681 The gff-file generated in the first round and the gene predictors were then used jointly in a  
682 second round of gene prediction. The number of resulting annotations ranged between 15  
683 689 - 17 229 and were of expected quality and size (Supplementary table 8, Supplementary  
684 figures 19 and 20). The final gene models were functionally annotated with Interproscan v.  
685 5.30-69.0 (Jones et al., 2014) and blast searches against Swiss-Prot.

686

#### 687 *Synteny analysis*

688 Gene synteny was compared between the male assemblies from each of the sequenced  
689 *Leptidea* species and the two reference species *Bombyx mori* and *Melitaea cinxia*, and in



690 addition *Pieris napi* (assemblies and annotations downloaded from NCBI 2021-04-25). First,  
691 reciprocal protein alignments were generated with blastp. The blast output was then trimmed  
692 to include the top five best hits per query. Finally, synteny blocks were built with MCSanX  
693 (Wang et al., 2012) using default settings but restricting the maximum gene gap size to 10 to  
694 reduce the amount of overlapping synteny blocks. The results were visualized with Synvisio  
695 (Bandi & Gutwin, 2020) and Circos v. 0.69-9 (Krzywinski et al., 2009).

696

#### 697 *Genome alignments*

698 To guide manual curation, estimate collinearity and detect rearrangements, all assemblies  
699 were aligned to the male assembly of each respective species with nucmer in MUMmer v.  
700 4.0.0rc1 (Marçais et al., 2018), using default settings. Alignments were restricted to the  
701 chromosome sized scaffolds of each assembly. The resulting alignments were filtered with  
702 delta-filter -1 to get 1-to-1 alignments including rearrangements. Male to female alignments  
703 for each species were visualized with dotplots using a modified version of the script  
704 'mummerCoordsDotPlotly.R' from dotPlotly (Poorten, 2018).

705

#### 706 *Rearrangement analysis*

707 Large scale rearrangements were identified from breakpoints in alignments, when queries  
708 changed from aligning against one reference scaffold to another. First, blocks of consecutive  
709 alignments (> 90% similarity) between the homologous scaffolds were built using a custom  
710 script, removing singleton queries against other scaffolds and only keeping blocks > 100 kb.  
711 Rearrangements were then classified using a phylogenetic approach, by finding unique or  
712 shared breakpoints between assemblies when aligned against the same reference using  
713 bedtools v. 2.29.2 (Quinlan & Hall, 2010). Each male assembly was separately used as  
714 reference, complemented by the alignment of the female assembly of the same species as  
715 an additional control for interspecific variation. Unique breakpoints were called as fissions in  
716 the query species while breakpoints shared by all query species were called as fusions in  
717 the reference. Following the same logic, we searched for shared breakpoints between all

718 possible combinations of species pairs to find potential cases of incomplete lineage sorting,  
719 reuse of breakpoints or rearrangements in ancestral *L. sinapis* (shared by both populations).  
720 The output of each separate comparison was checked and manually curated for any  
721 discrepancies resulting from using different references. In addition, based on the identified  
722 breakpoints, we quantified potential translocations as any case where two chromosomes in  
723 one species contained the same combination of parts from two chromosomes in another  
724 species (reciprocal) and cases where one chromosome had one alignment block flanked by  
725 two blocks from one other chromosome in another species (non-reciprocal).

726

### 727 *Breakpoint content analysis*

728 The composition of genetic elements in chromosome breakpoints was analyzed by  
729 comparing the observed mean density (here defined as proportion of base pairs) of coding  
730 sequence and different transposable element (TE) classes to random resampling  
731 distributions taken from the rest of the genomes. TEs from the same category and with  
732 overlapping coordinates were merged before analysis. Resampling (with replacement, 100 k  
733 iterations) was performed by taking random non-overlapping windows of the same size and  
734 number as identified fusions or fissions, and calculating the mean density of sequence  
735 elements across the sampled windows. The empirical means were compared to the  
736 generated resampling distributions using a two-tailed significance test. The false discovery  
737 rate was controlled for by adjusting p-values with the Benjamini-Hochberg method  
738 (Benjamini & Hochberg, 1995). Fusion and fission breakpoints were analyzed separately,  
739 only including events identified in the ingroup species (*L. sinapis* and *L. reali*) and excluding  
740 cases with ambiguous polarity. To account for variation in breakpoint size, breakpoints were  
741 standardized to 100 kb around their midpoint. In addition, separate tests were made for  
742 corresponding homologous regions in the alignment queries. Since there is no shared  
743 midpoint coordinate between two query chromosomes flanking a breakpoint, we instead  
744 selected two 50 kb windows starting from the last query coordinate of each alignment block  
745 and extending towards a theoretical point of breakage. The terminal 50 kb were selected in

746 cases where windows extended beyond the end of the query scaffold. Since the same set of  
747 query fissions were scored against two references and not necessarily overlapped, we  
748 selected the breakpoints with the coordinates closest to the terminal ends. Similarly, when  
749 the same chromosome end was associated with two different fusion events, we selected the  
750 outermost coordinates to represent the region. When analyzing query sequences, we  
751 excluded internal breakpoints, defined as occurring > 1 Mb from the chromosome terminal  
752 ends, as these cases indicate either fissions followed by subsequent fusions (not necessarily  
753 representative of a fission) or that different fusions have occurred in the reference and the  
754 query and are therefore already counted when each respective species is used as reference.  
755 The analysis was performed using bedtools v2.29.2 (Quinlan & Hall, 2010) and custom  
756 scripts.

757

758 Fusion breakpoints were investigated for the presence and accumulation of telomere  
759 associated LINE elements. Putative telomeric LINEs were first identified in the terminal 250  
760 kb of scaffolds of the DToL *L. sinapis* assembly (Lohse et al., 2022). Enrichment of specific  
761 LINEs in telomeric regions were then called with Fisher's exact test using an alpha level of  
762 0.05 and adjusting p-values with the Benjamini-Hochberg method (Benjamini & Hochberg,  
763 1995), and requiring at least the same count of each element in telomeric regions as the  
764 number of telomeres ( $n = 96$ ) and presence in telomeric regions of at least half of the  
765 chromosomes. Homologous LINEs in the other assemblies (Swedish + Catalan *L. sinapis*  
766 and *L. reali*) were then identified with reciprocal blast alignments, keeping all hits as putative  
767 telomere specific LINEs. Finally, accumulation was quantified by calculating the summed  
768 fraction of putative telomeric LINEs out of the total LINE density in fusion breakpoints. All  
769 statistical tests were performed in R (R Core Team, 2019) unless otherwise noted.

## 770 Competing interests statement

771 The authors declare no competing interests.

772

## 773 Data availability

774 All raw sequence data have been deposited at the European Nucleotide Archive under  
775 accession ENAXXXX. All in-house developed scripts and pipelines are available in GitHub  
776 (<https://github.com/EBC-butterfly-genomics-team>).

## 777 Acknowledgements

778 This work was funded by the Swedish Research Council (VR research grant #019-04791 to  
779 N.B.). The authors acknowledge support from the National Genomics Infrastructure in  
780 Stockholm funded by Science for Life Laboratory, the Knut and Alice Wallenberg Foundation  
781 and the Swedish Research Council, and SNIC/Uppsala Multidisciplinary Center for  
782 Advanced Computational Science for assistance with massively parallel sequencing and  
783 access to the UPPMAX computational infrastructure. We also acknowledge SciLifeLab in  
784 Uppsala for long-term bioinformatics support via the WABI initiative. R.V. was supported by  
785 project PID2019-107078GB-I00, funded by Ministerio de Ciencia e Innovación  
786 (MCIN)/Agencia Estatal de Investigación (AEI)/ 10.13039/501100011033.

787

## 788 References

789 Ahola, V., Lehtonen, R., Somervuo, P., Salmela, L., Koskinen, P., Rastas, P., Välimäki, N.,  
790 Paulin, L., Kvist, J., Wahlberg, N., Tanskanen, J., Hornett, E. A., Ferguson, L. C.,  
791 Luo, S., Cao, Z., de Jong, M. A., Duplouy, A., Smolander, O.-P., Vogel, H., ...  
792 Hanski, I. (2014). The Glanville fritillary genome retains an ancient karyotype and

- 793 reveals selective chromosomal fusions in Lepidoptera. *Nature Communications*, 5(1),  
794 4737. <https://doi.org/10.1038/ncomms5737>
- 795 Aljanabi, S. M., & Martinez, I. (1997). Universal and rapid salt-extraction of high quality  
796 genomic DNA for PCR-based techniques. *Nucleic Acids Research*, 25(22), 4692–  
797 4693. <https://doi.org/10.1093/nar/25.22.4692>
- 798 Almojil, D., Bourgeois, Y., Falis, M., Hariyani, I., Wilcox, J., & Boissinot, S. (2021). The  
799 Structural, Functional and Evolutionary Impact of Transposable Elements in  
800 Eukaryotes. *Genes*, 12(6), 918. <https://doi.org/10.3390/genes12060918>
- 801 Andrews, S. (2010). *Babraham Bioinformatics—FastQC A Quality Control tool for High*  
802 *Throughput Sequence Data*.  
803 <https://www.bioinformatics.babraham.ac.uk/projects/fastqc/>
- 804 Arunkumar, K. P., Mita, K., & Nagaraju, J. (2009). The Silkworm Z Chromosome Is Enriched  
805 in Testis-Specific Genes. *Genetics*, 182(2), 493–501.  
806 <https://doi.org/10.1534/genetics.108.099994>
- 807 Bandi, V., & Gutwin, C. (n.d.). *Interactive Exploration of Genomic Conservation*. 10.
- 808 Banno, Y., Kawaguchi, Y., Koga, K., & Doira, H. (1995). Postreductional meiosis revealed in  
809 males of the mutant with chromosomal aberration “T (23;25) Nd” of the silkworm  
810 *Bombyx mori*. *The Journal of Sericultural Science of Japan*, 64(5), 410–414.  
811 <https://doi.org/10.11416/kontyushigen1930.64.410>
- 812 Belyayev, A. (2014). Bursts of transposable elements as an evolutionary driving force.  
813 *Journal of Evolutionary Biology*, 27(12), 2573–2584.  
814 <https://doi.org/10.1111/jeb.12513>
- 815 Benjamini, Y., & Hochberg, Y. (1995). Controlling the False Discovery Rate: A Practical and  
816 Powerful Approach to Multiple Testing. *Journal of the Royal Statistical Society*.  
817 *Series B (Methodological)*, 57(1), 289–300.
- 818 Bernt, M., Donath, A., Jühling, F., Externbrink, F., Florentz, C., Fritzscht, G., Pütz, J.,  
819 Middendorf, M., & Stadler, P. F. (2013). MITOS: Improved de novo metazoan

- 820 mitochondrial genome annotation. *Molecular Phylogenetics and Evolution*, 69(2),  
821 313–319. <https://doi.org/10.1016/j.ympev.2012.08.023>
- 822 Blackmon, H., Justison, J., Mayrose, I., & Goldberg, E. E. (2019). Meiotic drive shapes rates  
823 of karyotype evolution in mammals. *Evolution*, 73(3), 511–523.  
824 <https://doi.org/10.1111/evo.13682>
- 825 Boggs, C. L., Watt, W. B., Ehrlich, P. R., Ehrlich, P. R., & Ehrlich, P. R. (2003). *Butterflies:  
826 Ecology and Evolution Taking Flight*. University of Chicago Press.
- 827 Bradbury, P. J., Zhang, Z., Koon, D. E., Casstevens, T. M., Ramdoss, Y., & Buckler, E. S.  
828 (2007). TASSEL: Software for association mapping of complex traits in diverse  
829 samples. *Bioinformatics*, 23(19), 2633–2635.  
830 <https://doi.org/10.1093/bioinformatics/btm308>
- 831 Brown, K. S., Jr, Von Schoultz, B., & Suomalainen, E. (2004). Chromosome evolution in  
832 Neotropical Danainae and Ithomiinae (Lepidoptera). *Hereditas*, 141(3), 216–236.  
833 <https://doi.org/10.1111/j.1601-5223.2004.01868.x>
- 834 Bushnell, B. (2019). *BBMap*. SourceForge. <https://sourceforge.net/projects/bbmap/>
- 835 Cantarel, B. L., Korf, I., Robb, S. M. C., Parra, G., Ross, E., Moore, B., Holt, C., Sánchez  
836 Alvarado, A., & Yandell, M. (2008). MAKER: An easy-to-use annotation pipeline  
837 designed for emerging model organism genomes. *Genome Research*, 18(1), 188–  
838 196. <https://doi.org/10.1101/gr.6743907>
- 839 Carbone, L., Alan Harris, R., Gnerre, S., Veeramah, K. R., Lorente-Galdos, B., Huddleston,  
840 J., Meyer, T. J., Herrero, J., Roos, C., Aken, B., Anaclerio, F., Archidiacono, N.,  
841 Baker, C., Barrell, D., Batzer, M. A., Beal, K., Blancher, A., Bohrsen, C. L., Brameier,  
842 M., ... Gibbs, R. A. (2014). Gibbon genome and the fast karyotype evolution of small  
843 apes. *Nature*, 513(7517), 195–201. <https://doi.org/10.1038/nature13679>
- 844 Catchen, J., Hohenlohe, P. A., Bassham, S., Amores, A., & Cresko, W. A. (2013). Stacks:  
845 An analysis tool set for population genomics. *Molecular Ecology*, 22(11), 3124–3140.  
846 <https://doi.org/10.1111/mec.12354>

- 847 Cicconardi, F., Lewis, J. J., Martin, S. H., Reed, R. D., Danko, C. G., & Montgomery, S. H.  
848 (2021). Chromosome Fusion Affects Genetic Diversity and Evolutionary Turnover of  
849 Functional Loci but Consistently Depends on Chromosome Size. *Molecular Biology  
850 and Evolution*, 38(10), 4449–4462. <https://doi.org/10.1093/molbev/msab185>
- 851 Davey, J. W., Chouteau, M., Barker, S. L., Maroja, L., Baxter, S. W., Simpson, F., Merrill, R.  
852 M., Joron, M., Mallet, J., Dasmahapatra, K. K., & Jiggins, C. D. (2016). Major  
853 Improvements to the *Heliconius melpomene* Genome Assembly Used to Confirm 10  
854 Chromosome Fusion Events in 6 Million Years of Butterfly Evolution. *G3: Genes,  
855 Genomes, Genetics*, 6(3), 695–708. <https://doi.org/10.1534/g3.115.023655>
- 856 de Vos, J. M., Augustijnen, H., Bätischer, L., & Lucek, K. (2020). Speciation through  
857 chromosomal fusion and fission in Lepidoptera. *Philosophical Transactions of the  
858 Royal Society B: Biological Sciences*, 375(1806), 20190539.  
859 <https://doi.org/10.1098/rstb.2019.0539>
- 860 Dierckxsens, N., Mardulyn, P., & Smits, G. (2017). NOVOPlasty: De novo assembly of  
861 organelle genomes from whole genome data. *Nucleic Acids Research*, 45(4), e18.  
862 <https://doi.org/10.1093/nar/gkw955>
- 863 Dincă, V., Lukhtanov, V. A., Talavera, G., & Vila, R. (2011). Unexpected layers of cryptic  
864 diversity in wood white *Leptidea* butterflies. *Nature Communications*, 2, 324.  
865 <https://doi.org/10.1038/ncomms1329>
- 866 Dudchenko, O., Batra, S. S., Omer, A. D., Nyquist, S. K., Hoeger, M., Durand, N. C.,  
867 Shamim, M. S., Machol, I., Lander, E. S., Aiden, A. P., & Aiden, E. L. (2017). De  
868 novo assembly of the *Aedes aegypti* genome using Hi-C yields chromosome-length  
869 scaffolds. *Science*, 356(6333), 92–95. <https://doi.org/10.1126/science.aal3327>
- 870 Durand, N. C., Robinson, J. T., Shamim, M. S., Machol, I., Mesirov, J. P., Lander, E. S., &  
871 Aiden, E. L. (2016). Juicebox Provides a Visualization System for Hi-C Contact Maps  
872 with Unlimited Zoom. *Cell Systems*, 3(1), 99–101.  
873 <https://doi.org/10.1016/j.cels.2015.07.012>

- 874 Durand, N. C., Shamim, M. S., Machol, I., Rao, S. S. P., Huntley, M. H., Lander, E. S., &  
875 Aiden, E. L. (2016). Juicer Provides a One-Click System for Analyzing Loop-  
876 Resolution Hi-C Experiments. *Cell Systems*, 3(1), 95–98.  
877 <https://doi.org/10.1016/j.cels.2016.07.002>
- 878 Espeland, M., Breinholt, J., Willmott, K. R., Warren, A. D., Vila, R., Toussaint, E. F. A.,  
879 Maunsell, S. C., Aduse-Poku, K., Talavera, G., Eastwood, R., Jarzyna, M. A.,  
880 Guralnick, R., Lohman, D. J., Pierce, N. E., & Kawahara, A. Y. (2018). A  
881 Comprehensive and Dated Phylogenomic Analysis of Butterflies. *Current Biology:*  
882 *CB*, 28(5), 770-778.e5. <https://doi.org/10.1016/j.cub.2018.01.061>
- 883 Faria, R., & Navarro, A. (2010). Chromosomal speciation revisited: Rearranging theory with  
884 pieces of evidence. *Trends in Ecology & Evolution*, 25(11), 660–669.  
885 <https://doi.org/10.1016/j.tree.2010.07.008>
- 886 Faulkner, J. S. (1972). Chromosome studies on *Carex* section *Acutae* in north-west Europe.  
887 *Botanical Journal of the Linnean Society*, 65(3), 271–301.  
888 <https://doi.org/10.1111/j.1095-8339.1972.tb00120.x>
- 889 Fraïsse, C., Picard, M. A. L., & Vicoso, B. (2017). The deep conservation of the Lepidoptera  
890 Z chromosome suggests a non-canonical origin of the W. *Nature Communications*,  
891 8(1), 1486. <https://doi.org/10.1038/s41467-017-01663-5>
- 892 Hill, J., Rastas, P., Hornett, E. A., Neethiraj, R., Clark, N., Morehouse, N., Celorio-Mancera,  
893 M. de la P., Cols, J. C., Dirksen, H., Meslin, C., Keehnen, N., Pruischer, P.,  
894 Sikkink, K., Vives, M., Vogel, H., Wiklund, C., Woronik, A., Boggs, C. L., Nylin, S., &  
895 Wheat, C. W. (2019). Unprecedented reorganization of holocentric chromosomes  
896 provides insights into the enigma of lepidopteran chromosome evolution. *Science*  
897 *Advances*, 5(6), eaau3648. <https://doi.org/10.1126/sciadv.aau3648>
- 898 Höök, L., Leal, L., Talla, V., & Backström, N. (2019). Multilayered Tuning of Dosage  
899 Compensation and Z-Chromosome Masculinization in the Wood White (*Leptidea*  
900 *sinapis*) Butterfly. *Genome Biology and Evolution*, 11(9), 2633–2652.  
901 <https://doi.org/10.1093/gbe/evz176>



- 902 Iannucci, A., Altmanová, M., Ciofi, C., Ferguson-Smith, M., Milan, M., Pereira, J. C., Pether,  
903 J., Reháč, I., Rovatsos, M., Stanyon, R., Velenský, P., Ráb, P., Kratochvíl, L., &  
904 Johnson Pokorná, M. (2019). Conserved sex chromosomes and karyotype evolution  
905 in monitor lizards (Varanidae). *Heredity*, *123*(2), 215–227.  
906 <https://doi.org/10.1038/s41437-018-0179-6>
- 907 Jones, P., Binns, D., Chang, H.-Y., Fraser, M., Li, W., McAnulla, C., McWilliam, H., Maslen,  
908 J., Mitchell, A., Nuka, G., Pesseat, S., Quinn, A. F., Sangrador-Vegas, A.,  
909 Scheremetjew, M., Yong, S.-Y., Lopez, R., & Hunter, S. (2014). InterProScan 5:  
910 Genome-scale protein function classification. *Bioinformatics*, *30*(9), 1236–1240.  
911 <https://doi.org/10.1093/bioinformatics/btu031>
- 912 Jurka, J. (1998). Repeats in genomic DNA: Mining and meaning. *Current Opinion in*  
913 *Structural Biology*, *8*(3), 333–337. [https://doi.org/10.1016/s0959-440x\(98\)80067-5](https://doi.org/10.1016/s0959-440x(98)80067-5)
- 914 Kandul, N. P., Lukhtanov, V. A., & Pierce, N. E. (2007). Karyotypic diversity and speciation in  
915 *Agrodiaetus* butterflies. *Evolution; International Journal of Organic Evolution*, *61*(3),  
916 546–559. <https://doi.org/10.1111/j.1558-5646.2007.00046.x>
- 917 Kawahara, A. Y., & Breinholt, J. W. (2014). Phylogenomics provides strong evidence for  
918 relationships of butterflies and moths. *Proceedings of the Royal Society B: Biological*  
919 *Sciences*, *281*(1788), 20140970. <https://doi.org/10.1098/rspb.2014.0970>
- 920 Kawakami, T., Butlin, R. K., Adams, M., Paull, David. J., & Cooper, S. J. B. (2009). Genetic  
921 Analysis of a Chromosomal Hybrid Zone in the Australian Morabine Grasshoppers  
922 (*vandiemena*, *Viatica* Species Group). *Evolution*, *63*(1), 139–152.  
923 <https://doi.org/10.1111/j.1558-5646.2008.00526.x>
- 924 Kohany, O., Gentles, A. J., Hankus, L., & Jurka, J. (2006). Annotation, submission and  
925 screening of repetitive elements in Repbase: RepbaseSubmitter and Censor. *BMC*  
926 *Bioinformatics*, *7*(1), 474. <https://doi.org/10.1186/1471-2105-7-474>
- 927 Korf, I. (2004). Gene finding in novel genomes. *BMC Bioinformatics*, *5*(1), 59.  
928 <https://doi.org/10.1186/1471-2105-5-59>

- 929 Krueger, F. (2019). *Babraham Bioinformatics—Trim Galore!*  
930 [https://www.bioinformatics.babraham.ac.uk/projects/trim\\_galore/](https://www.bioinformatics.babraham.ac.uk/projects/trim_galore/)
- 931 Krzywinski, M., Schein, J., Birol, I., Connors, J., Gascoyne, R., Horsman, D., Jones, S. J., &  
932 Marra, M. A. (2009). Circos: An information aesthetic for comparative genomics.  
933 *Genome Research*, 19(9), 1639–1645. <https://doi.org/10.1101/gr.092759.109>
- 934 Laetsch, D. R., & Blaxter, M. L. (2017). *BlobTools: Interrogation of genome assemblies*  
935 (6:1287). F1000Research. <https://doi.org/10.12688/f1000research.12232.1>
- 936 Larson, A., Prager, E. M., & Wilson, A. C. (1984). Chromosomal evolution, speciation and  
937 morphological change in vertebrates: The role of social behaviour. In M. D. Bennett,  
938 A. Gropp, & U. Wolf (Eds.), *Chromosomes Today: Volume 8 Proceedings of the*  
939 *Eighth International Chromosome Conference held in Lübeck, West Germany, 21–24*  
940 *September 1983* (pp. 215–228). Springer Netherlands. [https://doi.org/10.1007/978-](https://doi.org/10.1007/978-94-010-9163-3_20)  
941 [94-010-9163-3\\_20](https://doi.org/10.1007/978-94-010-9163-3_20)
- 942 Lewis, J. J., Cicconardi, F., Martin, S. H., Reed, R. D., Danko, C. G., & Montgomery, S. H.  
943 (2021). The *Dryas iulia* Genome Supports Multiple Gains of a W Chromosome from a  
944 B Chromosome in Butterflies. *Genome Biology and Evolution*, 13(7), evab128.  
945 <https://doi.org/10.1093/gbe/evab128>
- 946 Li, H. (2011). Improving SNP discovery by base alignment quality. *Bioinformatics*, 27(8),  
947 1157–1158. <https://doi.org/10.1093/bioinformatics/btr076>
- 948 Li, H. (2013). *Aligning sequence reads, clone sequences and assembly contigs with BWA-*  
949 *MEM* (arXiv:1303.3997). arXiv. <https://doi.org/10.48550/arXiv.1303.3997>
- 950 Li, H., Handsaker, B., Wysoker, A., Fennell, T., Ruan, J., Homer, N., Marth, G., Abecasis,  
951 G., Durbin, R., & 1000 Genome Project Data Processing Subgroup. (2009). The  
952 Sequence Alignment/Map format and SAMtools. *Bioinformatics (Oxford, England)*,  
953 25(16), 2078–2079. <https://doi.org/10.1093/bioinformatics/btp352>
- 954 Lohse, K., Höök, L., Näsvall, K., & Backström, N. (2022). The genome sequence of the wood  
955 white butterfly, *Leptidea sinapis* (Linnaeus, 1758). *Welcome Open Research*,  
956 *Submitted*.

- 957 Lukhtanov, V. A., Dincă, V., Friberg, M., Šíchová, J., Olofsson, M., Vila, R., Marec, F., &  
958 Wiklund, C. (2018). Versatility of multivalent orientation, inverted meiosis, and  
959 rescued fitness in holocentric chromosomal hybrids. *Proceedings of the National*  
960 *Academy of Sciences*, *115*(41), E9610–E9619.  
961 <https://doi.org/10.1073/pnas.1802610115>
- 962 Lukhtanov, V. A., Dincă, V., Friberg, M., Vila, R., & Wiklund, C. (2020). Incomplete Sterility of  
963 Chromosomal Hybrids: Implications for Karyotype Evolution and Homoploid Hybrid  
964 Speciation. *Frontiers in Genetics*, *11*. <https://doi.org/10.3389/fgene.2020.583827>
- 965 Lukhtanov, V. A., Dincă, V., Talavera, G., & Vila, R. (2011). Unprecedented within-species  
966 chromosome number cline in the Wood White butterfly *Leptidea sinapis* and its  
967 significance for karyotype evolution and speciation. *BMC Evolutionary Biology*, *11*,  
968 109. <https://doi.org/10.1186/1471-2148-11-109>
- 969 Marçais, G., Delcher, A. L., Phillippy, A. M., Coston, R., Salzberg, S. L., & Zimin, A. (2018).  
970 MUMmer4: A fast and versatile genome alignment system. *PLoS Computational*  
971 *Biology*, *14*(1), e1005944. <https://doi.org/10.1371/journal.pcbi.1005944>
- 972 Marks, P., Garcia, S., Barrio, A. M., Belhocine, K., Bernate, J., Bharadwaj, R., Bjornson, K.,  
973 Catalanotti, C., Delaney, J., Fehr, A., Fiddes, I. T., Galvin, B., Heaton, H., Herschleb,  
974 J., Hindson, C., Holt, E., Jabara, C. B., Jett, S., Keivanfar, N., ... Church, D. M.  
975 (2019). Resolving the full spectrum of human genome variation using Linked-Reads.  
976 *Genome Research*, *29*(4), 635–645. <https://doi.org/10.1101/gr.234443.118>
- 977 Martin, M. (2011). Cutadapt removes adapter sequences from high-throughput sequencing  
978 reads. *EMBnet.Journal*, *17*(1), 10–12. <https://doi.org/10.14806/ej.17.1.200>
- 979 Mathers, T. C., Wouters, R. H. M., Mugford, S. T., Swarbreck, D., van Oosterhout, C., &  
980 Hogenhout, S. A. (2021). Chromosome-Scale Genome Assemblies of Aphids Reveal  
981 Extensively Rearranged Autosomes and Long-Term Conservation of the X  
982 Chromosome. *Molecular Biology and Evolution*, *38*(3), 856–875.  
983 <https://doi.org/10.1093/molbev/msaa246>

- 984 Mayrose, I., & Lysak, M. A. (2021). The Evolution of Chromosome Numbers: Mechanistic  
985 Models and Experimental Approaches. *Genome Biology and Evolution*, 13(2),  
986 evaa220. <https://doi.org/10.1093/gbe/evaa220>
- 987 McKenna, A., Hanna, M., Banks, E., Sivachenko, A., Cibulskis, K., Kernytsky, A., Garimella,  
988 K., Altshuler, D., Gabriel, S., Daly, M., & DePristo, M. A. (2010). The Genome  
989 Analysis Toolkit: A MapReduce framework for analyzing next-generation DNA  
990 sequencing data. *Genome Research*, 20(9), 1297–1303.  
991 <https://doi.org/10.1101/gr.107524.110>
- 992 Melters, D. P., Paliulis, L. V., Korf, I. F., & Chan, S. W. L. (2012). Holocentric chromosomes:  
993 Convergent evolution, meiotic adaptations, and genomic analysis. *Chromosome*  
994 *Research*, 20(5), 579–593. <https://doi.org/10.1007/s10577-012-9292-1>
- 995 Miller, W. J., & Capy, P. (2004). Mobile genetic elements as natural tools for genome  
996 evolution. *Methods in Molecular Biology (Clifton, N.J.)*, 260, 1–20.  
997 <https://doi.org/10.1385/1-59259-755-6:001>
- 998 Mongue, A. J., Nguyen, P., Voleníková, A., & Walters, J. R. (2017). Neo-sex Chromosomes  
999 in the Monarch Butterfly, *Danaus plexippus*. *G3 Genes/Genomes/Genetics*, 7(10),  
1000 3281–3294. <https://doi.org/10.1534/g3.117.300187>
- 1001 Mongue, A. J., & Walters, J. R. (2018). The Z chromosome is enriched for sperm proteins in  
1002 two divergent species of Lepidoptera. *Genome*, 61(4), 248–253.  
1003 <https://doi.org/10.1139/gen-2017-0068>
- 1004 Nanda, I., Schlegelmilch, K., Haaf, T., Scharl, M., & Schmid, M. (2008). Synteny  
1005 conservation of the Z chromosome in 14 avian species (11 families) supports a role  
1006 for Z dosage in avian sex determination. *Cytogenetic and Genome Research*, 122(2),  
1007 150–156. <https://doi.org/10.1159/000163092>
- 1008 Nguyen, P., Sýkorová, M., Šichová, J., Kůta, V., Dalíková, M., Čapková Frydrychová, R.,  
1009 Neven, L. G., Sahara, K., & Marec, F. (2013). Neo-sex chromosomes and adaptive  
1010 potential in tortricid pests. *Proceedings of the National Academy of Sciences*,  
1011 110(17), 6931–6936. <https://doi.org/10.1073/pnas.1220372110>

- 1012 Okazaki, S., Ishikawa, H., & Fujiwara, H. (1995). Structural analysis of TRAS1, a novel  
1013 family of telomeric repeat-associated retrotransposons in the silkworm, *Bombyx mori*.  
1014 *Molecular and Cellular Biology*, 15(8), 4545–4552.  
1015 <https://doi.org/10.1128/MCB.15.8.4545>
- 1016 Okonechnikov, K., Conesa, A., & García-Alcalde, F. (2016). Qualimap 2: Advanced multi-  
1017 sample quality control for high-throughput sequencing data. *Bioinformatics*, 32(2),  
1018 292–294. <https://doi.org/10.1093/bioinformatics/btv566>
- 1019 Pazhenkova, E. A., & Lukhtanov, V. A. (2022). *Chromosomal conservatism vs chromosomal*  
1020 *megaevolution: Enigma of karyotypic evolution in Lepidoptera* (p.  
1021 2022.06.05.494852). bioRxiv. <https://doi.org/10.1101/2022.06.05.494852>
- 1022 Pennell, M. W., Kirkpatrick, M., Otto, S. P., Vamosi, J. C., Peichel, C. L., Valenzuela, N., &  
1023 Kitano, J. (2015). Y Fuse? Sex Chromosome Fusions in Fishes and Reptiles. *PLOS*  
1024 *Genetics*, 11(5), e1005237. <https://doi.org/10.1371/journal.pgen.1005237>
- 1025 Petitpierre, E. (1987). Why beetles have strikingly different rates of chromosomal evolution?  
1026 *Elytron. Bulletin of the European Association of Coleopterology*, 1, 25–32.
- 1027 Poorten, T. (2018). *DotPlotly* [HTML]. <https://github.com/tpoorten/dotPlotly> (Original work  
1028 published 2017)
- 1029 Pringle, E. G., Baxter, S. W., Webster, C. L., Papanicolaou, A., Lee, S. F., & Jiggins, C. D.  
1030 (2007). Synteny and Chromosome Evolution in the Lepidoptera: Evidence From  
1031 Mapping in *Heliconius melpomene*. *Genetics*, 177(1), 417–426.  
1032 <https://doi.org/10.1534/genetics.107.073122>
- 1033 Quinlan, A. R., & Hall, I. M. (2010). BEDTools: A flexible suite of utilities for comparing  
1034 genomic features. *Bioinformatics (Oxford, England)*, 26(6), 841–842.  
1035 <https://doi.org/10.1093/bioinformatics/btq033>
- 1036 R Core Team. (2019). *R: The R Project for Statistical Computing*. <https://www.r-project.org/>
- 1037 Rastas, P. (2017). Lep-MAP3: Robust linkage mapping even for low-coverage whole  
1038 genome sequencing data. *Bioinformatics*, 33(23), 3726–3732.  
1039 <https://doi.org/10.1093/bioinformatics/btx494>

- 1040 Rieseberg, L. H. (2001). Chromosomal rearrangements and speciation. *Trends in Ecology &*  
1041 *Evolution*, 16(7), 351–358. [https://doi.org/10.1016/s0169-5347\(01\)02187-5](https://doi.org/10.1016/s0169-5347(01)02187-5)
- 1042 Robinson, R. (1971). *Lepidoptera Genetics*. Pergamon Press.
- 1043 Román-Palacios, C., Medina, C. A., Zhan, S. H., & Barker, M. S. (2021). Animal  
1044 chromosome counts reveal a similar range of chromosome numbers but with less  
1045 polyploidy in animals compared to flowering plants. *Journal of Evolutionary Biology*,  
1046 34(8), 1333–1339. <https://doi.org/10.1111/jeb.13884>
- 1047 Rovatsos, M., Vukić, J., Lymberakis, P., & Kratochvíl, L. (2015). Evolutionary stability of sex  
1048 chromosomes in snakes. *Proceedings. Biological Sciences*, 282(1821), 20151992.  
1049 <https://doi.org/10.1098/rspb.2015.1992>
- 1050 Ruckman, S. N., Jonika, M. M., Casola, C., & Blackmon, H. (2020). Chromosome number  
1051 evolves at equal rates in holocentric and monocentric clades. *PLOS Genetics*,  
1052 16(10), e1009076. <https://doi.org/10.1371/journal.pgen.1009076>
- 1053 Sahara, K., Yoshido, A., & Traut, W. (2012). Sex chromosome evolution in moths and  
1054 butterflies. *Chromosome Research*, 20(1), 83–94. [https://doi.org/10.1007/s10577-](https://doi.org/10.1007/s10577-011-9262-z)  
1055 011-9262-z
- 1056 Sambrook, J., & Russell, D. W. (2006). Purification of nucleic acids by extraction with  
1057 phenol:chloroform. *CSH Protocols*, 2006(1), pdb.prot4455.  
1058 <https://doi.org/10.1101/pdb.prot4455>
- 1059 Šichová, J., Ohno, M., Dincă, V., Watanabe, M., Sahara, K., & Marec, F. (2016). Fissions,  
1060 fusions, and translocations shaped the karyotype and multiple sex chromosome  
1061 constitution of the northeast-Asian wood white butterfly, *Leptidea amurensis*.  
1062 *Biological Journal of the Linnean Society*, 118(3), 457–471.  
1063 <https://doi.org/10.1111/bij.12756>
- 1064 Šichová, J., Voleníková, A., Dincă, V., Nguyen, P., Vila, R., Sahara, K., & Marec, F. (2015).  
1065 Dynamic karyotype evolution and unique sex determination systems in *Leptidea*  
1066 wood white butterflies. *BMC Evolutionary Biology*, 15, 89.  
1067 <https://doi.org/10.1186/s12862-015-0375-4>

- 1068 Simão, F. A., Waterhouse, R. M., Ioannidis, P., Kriventseva, E. V., & Zdobnov, E. M. (2015).  
1069 BUSCO: Assessing genome assembly and annotation completeness with single-  
1070 copy orthologs. *Bioinformatics*, 31(19), 3210–3212.  
1071 <https://doi.org/10.1093/bioinformatics/btv351>
- 1072 Smit, A., & Hubley, R. (2017). *RepeatModeler*.  
1073 <https://www.repeatmasker.org/RepeatModeler/>
- 1074 Smit, A., Hubley, R., & Green, P. (2019). *RepeatMasker*. <https://www.repeatmasker.org/>
- 1075 Sotero-Caio, C. G., Volleth, M., Hoffmann, F. G., Scott, L., Wichman, H. A., Yang, F., &  
1076 Baker, R. J. (2015). Integration of molecular cytogenetics, dated molecular  
1077 phylogeny, and model-based predictions to understand the extreme chromosome  
1078 reorganization in the Neotropical genus *Tonatia* (Chiroptera: Phyllostomidae). *BMC*  
1079 *Evolutionary Biology*, 15(1), 220. <https://doi.org/10.1186/s12862-015-0494-y>
- 1080 Stanke, M., Diekhans, M., Baertsch, R., & Haussler, D. (2008). Using native and syntenically  
1081 mapped cDNA alignments to improve de novo gene finding. *Bioinformatics*, 24(5),  
1082 637–644. <https://doi.org/10.1093/bioinformatics/btn013>
- 1083 Suomalainen, E. (1953). The Kinetochores and the Bivalent Structure in the Lepidoptera.  
1084 *Hereditas*, 39(1–2), 88–96. <https://doi.org/10.1111/j.1601-5223.1953.tb03403.x>
- 1085 Sylvester, T., Hjelman, C. E., Hanrahan, S. J., Lenhart, P. A., Johnston, J. S., & Blackmon,  
1086 H. (2020). Lineage-specific patterns of chromosome evolution are the rule not the  
1087 exception in Polyneoptera insects. *Proceedings of the Royal Society B: Biological*  
1088 *Sciences*, 287(1935), 20201388. <https://doi.org/10.1098/rspb.2020.1388>
- 1089 Takahashi, H., Okazaki, S., & Fujiwara, H. (1997). A New Family of Site-Specific  
1090 Retrotransposons, SART1, Is Inserted into Telomeric Repeats of the Silkworm,  
1091 *Bombyx Mori*. *Nucleic Acids Research*, 25(8), 1578–1584.  
1092 <https://doi.org/10.1093/nar/25.8.1578>
- 1093 Talla, V., Soler, L., Kawakami, T., Dincă, V., Vila, R., Friberg, M., Wiklund, C., & Backström,  
1094 N. (2019). Dissecting the Effects of Selection and Mutation on Genetic Diversity in

- 1095 Three Wood White (Leptidea) Butterfly Species. *Genome Biology and Evolution*,  
1096 11(10), 2875–2886. <https://doi.org/10.1093/gbe/evz212>
- 1097 Talla, V., Suh, A., Kalsoom, F., Dinca, V., Vila, R., Friberg, M., Wiklund, C., & Backström, N.  
1098 (2017). Rapid Increase in Genome Size as a Consequence of Transposable Element  
1099 Hyperactivity in Wood-White (Leptidea) Butterflies. *Genome Biology and Evolution*,  
1100 9(10), 2491–2505. <https://doi.org/10.1093/gbe/evx163>
- 1101 Tang, M., He, S., Gong, X., Lü, P., Taha, R. H., & Chen, K. (2021). High-Quality de novo  
1102 Chromosome-Level Genome Assembly of a Single *Bombyx mori* With BmNPV  
1103 Resistance by a Combination of PacBio Long-Read Sequencing, Illumina Short-Read  
1104 Sequencing, and Hi-C Sequencing. *Frontiers in Genetics*, 12, 718266.  
1105 <https://doi.org/10.3389/fgene.2021.718266>
- 1106 Traut, W., Sahara, K., & Marec, F. (2007). Sex Chromosomes and Sex Determination in  
1107 Lepidoptera. *Sexual Development*, 1(6), 332–346. <https://doi.org/10.1159/000111765>
- 1108 Turner, J. R. G., & Sheppard, P. M. (1975). Absence of crossing-over in female butterflies  
1109 (*Heliconius*). *Heredity*, 34(2), 265–269. <https://doi.org/10.1038/hdy.1975.29>
- 1110 Vicoso, B. (2019). Molecular and evolutionary dynamics of animal sex-chromosome  
1111 turnover. *Nature Ecology & Evolution*, 3(12), 1632–1641.  
1112 <https://doi.org/10.1038/s41559-019-1050-8>
- 1113 Wang, Y., Tang, H., Debarry, J. D., Tan, X., Li, J., Wang, X., Lee, T., Jin, H., Marler, B., Guo,  
1114 H., Kissinger, J. C., & Paterson, A. H. (2012). MCScanX: A toolkit for detection and  
1115 evolutionary analysis of gene synteny and collinearity. *Nucleic Acids Research*,  
1116 40(7), e49. <https://doi.org/10.1093/nar/gkr1293>
- 1117 Weisenfeld, N. I., Kumar, V., Shah, P., Church, D. M., & Jaffe, D. B. (2017). Direct  
1118 determination of diploid genome sequences. *Genome Research*, 27(5), 757–767.  
1119 <https://doi.org/10.1101/gr.214874.116>
- 1120 Wingett, S. W., & Andrews, S. (2018). FastQ Screen: A tool for multi-genome mapping and  
1121 quality control. *F1000Research*, 7, 1338.  
1122 <https://doi.org/10.12688/f1000research.15931.2>



1123 Yoshido, A., Šíchová, J., Pospíšilová, K., Nguyen, P., Voleníková, A., Šafář, J., Provazník,  
1124 J., Vila, R., & Marec, F. (2020). Evolution of multiple sex-chromosomes associated  
1125 with dynamic genome reshuffling in *Leptidea* wood-white butterflies. *Heredity*, *125*(3),  
1126 138–154. <https://doi.org/10.1038/s41437-020-0325-9>  
1127
